1 **Sulfated RaxX, which represents an unclassified group of ribosomally**  
2 **synthesized post-translationally modified peptides, binds a host immune receptor**

3

4 Dee Dee Luu<sup>1,8</sup>, Anna Joe<sup>1,2,8</sup>, Yan Chen<sup>3</sup>, Katarzyna Parys<sup>4</sup>, Ofir Bahar<sup>1,5</sup>, Rory  
5 Pruitt<sup>1,6</sup>, Leanne Jade G. Chen<sup>3</sup>, Christopher J. Petzold<sup>3</sup>, Kelsey Long<sup>1</sup>, Clifford  
6 Adamchak<sup>1</sup>, Valley Stewart<sup>7</sup>, Youssef Belkhadir<sup>4</sup>, Pamela C. Ronald<sup>1,2,9,\*</sup>

7

8 <sup>1</sup>Department of Plant Pathology and the Genome Center, University of California, Davis,  
9 CA 95616, USA

10 <sup>2</sup>Feedstocks Division, Joint Bioenergy Institute, Emeryville, CA 94608, USA

11 <sup>3</sup>Technology Division, Joint Bioenergy Institute, Emeryville, CA 94608, USA

12 <sup>4</sup>Gregor Mendel Institute, Austrian Academy of Sciences, Vienna Biocenter, Dr Bohr  
13 Gasse 3, Vienna, Austria

14 <sup>5</sup>Present address: Department of Plant Pathology and Weed Research, Agricultural  
15 Research Organization, Volcani Center, Rishon LeZion, Israel

16 <sup>6</sup>Present address: Department of Plant Biochemistry, University of Tübingen, D-72076  
17 Tübingen, Germany

18 <sup>7</sup>Department of Microbiology & Molecular Genetics, University of California, Davis, CA  
19 95616, USA

20 <sup>8</sup>These authors contributed equally

21 <sup>9</sup>Lead contact

22 \*Correspondence: [pcronald@ucdavis.edu](mailto:pcronald@ucdavis.edu)

23

## 24 **ABSTRACT**

25           The rice immune receptor XA21 is activated by the sulfated microbial peptide  
26 RaxX (required for activation of XA21-mediated immunity X) produced by *Xanthomonas*  
27 *oryzae* pv. *oryzae* (Xoo). Mutational studies and targeted proteomics revealed that  
28 RaxX is processed and secreted by the protease/transporter RaxB, whose function can  
29 be partially fulfilled by a noncognate peptidase-containing transporter B (PctB). RaxX is  
30 cleaved at a Gly-Gly motif, yielding a mature peptide that retains the necessary  
31 elements for RaxX function as an immunogen and host peptide hormone mimic. These  
32 results indicate that RaxX is a founding member of a previously unclassified and  
33 understudied group of tyrosine sulfated RiPPs (ribosomally synthesized, post-  
34 translationally modified peptides). We further demonstrate that sulfated RaxX directly  
35 binds XA21 with high affinity. This work reveals a complete, previously uncharacterized  
36 biological process: bacterial RiPP biosynthesis, secretion, binding to a eukaryotic  
37 receptor and triggering of a robust host immune response.

38

## 39 **INTRODUCTION**

40

41           Ribosomally synthesized and post-translationally modified peptides (RiPPs)  
42 include anti-microbial, anti-cancer, insecticidal, and quorum sensing peptides (Arnison  
43 et al., 2013). RiPPs are structurally and functionally diverse yet share commonalities.  
44 They are ribosomally synthesized as a precursor peptide with a cleavable N-terminal  
45 leader and a post-translationally modified core that becomes the final secreted bioactive  
46 RiPP (Figure 1A; Arnison et al., 2013). Many RiPP leaders direct the modification and/or

47 export proteins to the core. This permits the biosynthetic proteins to act on a diverse  
48 range of core peptides while maintaining substrate specificity (Oman and van der Donk,  
49 2010) and allows for leader peptide-guided designed synthesis of hybrid RiPPs  
50 (Burkhart et al., 2017).

51 RiPPs achieve substantial chemical diversity through extensive post-translational  
52 modifications and are divided into over 20 groups (Arnison et al., 2013). One group that  
53 has not been well-studied nor formally categorized as RiPPs are tyrosine sulfated  
54 peptides.

55 Tyrosine sulfation is a post-translational modification that influences receptor-  
56 ligand binding in diverse host-microbe interactions (Stone et al., 2009). For example, in  
57 humans, tyrosine sulfation of the integral membrane protein CCR5 (C-C chemokine  
58 receptor type 5) significantly enhances binding of the human immunodeficiency virus  
59 (HIV) envelope glycoprotein, facilitating HIV entry (Farzan et al., 1999).

60 In rice, the transmembrane immune receptor XA21, which shares similarities to  
61 animal TOLL like receptors (TLRs) and the *Arabidopsis* flagellin-sensitive 2 (FLS2) and  
62 EF-Tu receptors (EFR) (Dardick et al., 2012), responds to sulfated derivatives of the  
63 microbial peptide RaxX (required for activation of XA21-mediated immunity X) produced  
64 by the Gram-negative pathogenic bacterium *Xanthomonas oryzae* pv. *oryzae* (*Xoo*)  
65 (Pruitt et al., 2015, 2017; Schwessinger et al., 2016; Wei et al., 2016). Tyrosine sulfated  
66 RaxX16, a 16-residue synthetic peptide derived from residues 40-55 of the 60-residue  
67 RaxX precursor, is the shortest characterized immunogenic derivative of RaxX (Pruitt et  
68 al., 2017). RaxX16 shares a 13-residue sequence with high similarity to the 18-residue  
69 plant peptide hormone PSY1 (plant peptide containing sulfated tyrosine; Pruitt et al.,

70 2017). PSY1 promotes cellular proliferation and expansion *in planta* (Amano et al.,  
71 2007) and increases root growth in both *Arabidopsis* and rice (Pruitt et al., 2017).  
72 Exogenous application of sulfated RaxX16 also promotes root growth (Pruitt et al.,  
73 2017), which is consistent with the hypothesis that RaxX mimics host PSY1 and PSY1-  
74 like proteins. These observations indicate that RaxX16 contains the biologically active  
75 domain of RaxX.

76 In *Arabidopsis*, PSY1 is ribosomally synthesized as a 75-residue precursor  
77 peptide and proteolytically processed into the mature secreted 18-residue sulfated and  
78 glycosylated peptide (Amano et al., 2007). Based on similarities between PSY1 and  
79 RaxX16, we hypothesized that sulfated RaxX is also processed and secreted to  
80 produce an extracellular molecule that can interact with host receptors.

81 The *raxX* gene is adjacent to the *raxSTAB* operon, encoding the RaxST  
82 tyrosylprotein sulfotransferase, which catalyzes sulfation of RaxX tyrosine residue 41,  
83 and two components of a predicted type I secretion system (T1SS): the RaxA  
84 periplasmic adaptor protein and the RaxB peptidase-containing ABC (ATP-binding  
85 cassette) transporter (PCAT; Figure 1B; Pruitt et al., 2015; da Silva et al., 2004). In  
86 other characterized PCATs, the N-terminal peptidase domain cleaves the substrate  
87 leader immediately after a Gly-Gly (GG) motif, and the processed substrate is secreted  
88 through the PCAT, periplasmic adaptor protein and TolC, an outer membrane channel  
89 protein (Kanonenberg et al., 2013).

90 Previously, we reported that derivatives of the immunogenic *Xoo* strain PXO99  
91 containing null alleles of *raxX*, *raxST*, or *raxC* (encoding the *Xoo* TolC ortholog) evade  
92 XA21-mediated recognition, but strains with null alleles of *raxA* or *raxB* elicit a partial

93 XA21-mediated immune response (Pruitt et al., 2015; da Silva et al., 2004). These  
94 results suggest that RaxA and RaxB are important for RaxX secretion but RaxX can  
95 also be released outside the cell independent of *raxA/raxB*.

96 Here, we report that synthetic RaxX peptide directly binds the extracellular  
97 domain (ECD) of the XA21 immune receptor (XA21<sup>ECD</sup>), an interaction enhanced by  
98 tyrosine sulfation of RaxX. We also demonstrate that RaxB is required for proteolytic  
99 processing and secretion of RaxX and identify a second PCAT PctB (peptidase-  
100 containing transporter component B) that can partially compensate for deletion of *raxB*.  
101 Our genetics and targeted proteomics data indicate that RaxX is ribosomally  
102 synthesized as a precursor peptide and cleaved downstream of a GG-motif in a RaxB-  
103 dependent manner. This proteolytic event releases the mature RaxX core peptide  
104 containing the sulfated Tyr-41 and the minimal 16-residue active region (Figure 1B).  
105 These results indicate that RaxX is a tyrosine sulfated RiPP, a previously undescribed  
106 class of RiPPs that mediate intercellular interactions.

107

## 108 **RESULTS**

109

### 110 **Sulfated RaxX peptide binds XA21 with high affinity**

111 We previously demonstrated that *in vivo* tyrosine sulfation of RaxX by RaxST is  
112 required to activate XA21-dependent immune responses (Pruitt et al., 2015), suggesting  
113 that sulfated, but not non-sulfated, RaxX is recognized by XA21. To test if RaxX directly  
114 binds to the XA21 immune receptor, we used microscale thermophoresis (MST), an  
115 optical tool that analyzes protein and small-molecule interactions (Wienken et al., 2010).

116 The MST assays were conducted using XA21<sup>ECD</sup> (XA21 residues 23-649) with varying  
117 concentrations of peptide to measure the dissociation constant ( $K_D$ ). When we titrated a  
118 synthetic 21-residue derivative of RaxX (RaxX21; residues 35-55) in the presence of  
119 XA21<sup>ECD</sup>, we observed a  $K_D$  of 400 nM with the non-sulfated form (RaxX21-nY; Figure  
120 2). This  $K_D$  is 20-fold higher than the sulfated form (RaxX21-sY), which had a  $K_D$  of 20  
121 nM (Figure 2), indicating that sulfated RaxX binds XA21 with higher affinity than non-  
122 sulfated RaxX.

123 Although RaxX shares similarities with PSY1 in both sequence and root growth-  
124 promoting activities, synthetic sulfated PSY1 peptides derived from *Arabidopsis* and rice  
125 fail to activate XA21-dependent immune responses (Pruitt et al., 2017). Consistent with  
126 these reports, sulfated PSY1 failed to specifically bind XA21<sup>ECD</sup> (Figure 2). These  
127 results indicate that RaxX binding to XA21<sup>ECD</sup> is a specific interaction, which is  
128 enhanced by sulfation.

129

### 130 **SRM-MS detects RaxX as a secreted mature peptide**

131 Based on its similarity to PSY1 and its direct binding to XA21<sup>ECD</sup>, we  
132 hypothesized that sulfated RaxX interacts with host receptors as a secreted  
133 proteolytically processed, mature peptide. To test this hypothesis, we assessed the  
134 presence of secreted RaxX in the extracellular milieu. Secreted proteins were harvested  
135 from *Xoo* strains grown in plant-mimicking media, concentrated, and digested with  
136 trypsin. The predicted mature and non-processed precursor RaxX peptides  
137 (represented by the DYPPPGANPK and HVGGGDYPPPGANPK tryptic peptides,  
138 respectively) were specifically detected by selected reaction monitoring-mass

139 spectrometry (SRM-MS), which was calibrated using tryptic digests of RaxX16  
140 (DYPPPGANPKHDPPPR) synthetic peptide and purified recombinant full-length RaxX  
141 (RaxX60; Figures 3A, S1A, and S1B).

142         Similar to previous reports, we detected the RaxX non-processed precursor in  
143 the cell lysate (Figure 3B; Pruitt et al., 2015). However, only mature, processed RaxX  
144 was detected in the supernatant of the wildtype PXO99 strain (Figure 3). Mature RaxX  
145 was not detected in the  $\Delta raxX$  negative control (Figures 3C and 3D), indicating that the  
146 observed peaks are specific for RaxX. Because trypsin is not known to cleave after  
147 glycine, which precedes the detected DYPPPGANPK tryptic peptide, these results  
148 suggest that the RaxX precursor is cleaved by an endogenous *Xoo* protease after Gly-  
149 39 and secreted outside the cell as a mature peptide (Figure 1B).

150         We also attempted immunoblot analysis as a complementary method to detect  
151 RaxX. However, an antibody generated against RaxX failed to detect RaxX16 or RaxX  
152 from *Xoo* supernatants (Figures S1C and S1D). We therefore used SRM-MS alone in  
153 subsequent experiments to verify RaxX secretion.

154

### 155 **Sequence analysis identifies a candidate secondary RaxX maturation and** 156 **secretion system: PctAB**

157         Prokaryotic RiPPs typically encode the maturation and secretion proteins in the  
158 same genomic region as the peptide (Figure 1A). We previously demonstrated that a  
159 strain carrying a null allele of *raxC*, encoding the predicted T1SS outer membrane  
160 protein, fails to activate XA21-mediated immunity, supporting a role for *raxC* in RaxX  
161 secretion (da Silva et al., 2004). In contrast, strains carrying null alleles of *raxB* or *raxA*,

162 encoding the putative RaxX-associated PCAT and periplasmic adaptor proteins,  
163 respectively, maintain the ability to partially activate XA21-mediated immunity (da Silva  
164 et al., 2004). These results suggest that RaxX can be released in a *raxA/raxB*-  
165 independent manner.

166 The RaxB sequence contains an N-terminal C39 peptidase domain characteristic  
167 of PCATs (e.g. *Escherichia coli* colicin V (ColV) transporter CvaB), which have dual  
168 functionality as both a transporter and protease (Figure 4A; da Silva et al., 2004;  
169 Håvarstein et al., 1995; Wu and Tai, 2004). Query of the RaxB C39 peptidase domain  
170 sequence in BLAST searches of the PXO99 genome identified only one other candidate  
171 PCAT, which shares 50% sequence identity with RaxB (41% identity with *E. coli* CvaB).  
172 We named this gene (PXO\_RS14825) as *pctB* (Figure 4B).

173 Immediately upstream of *pctB* is a gene, which we named *pctP* (PXO\_RS14830),  
174 encoding a putative rhomboid family intramembrane serine protease (Figure 4B) that  
175 typically cleaves the transmembrane domain of membrane proteins (Freeman, 2014).  
176 Further upstream are an insertion sequence (*IS1112*), a region of uncertain heritage  
177 likely derived from multiple insertion and deletion events, and a predicted gene  
178 (PXO\_RS14840), which we named *pctA*, encoding a putative periplasmic adaptor  
179 protein (Figure 4B). PctA shares 32% sequence identity with RaxA (24% identity with *E.*  
180 *coli* CvaA, the adaptor component of the ColV secretion system (Zhang et al., 1995)).  
181 Given the close proximity of *pctA* and *pctB* and the absence of other PCAT-encoding  
182 genes in the genome, we hypothesized that PctA and PctB form an alternate T1SS that  
183 can secrete sufficient levels of sulfated RaxX to activate XA21.

184



## 185 **PctB partially compensates for the loss of RaxB**

186 To assess the potential role of PctB in RaxX maturation and secretion, we  
187 deleted *raxB* and *pctB* singly or together from the PXO99 genome. The resultant mutant  
188 strains (designated  $\Delta raxB$ ,  $\Delta pctB$ , and  $\Delta raxB \Delta pctB$ , respectively) were inoculated onto  
189 rice plants by clipping leaf tips with scissors dipped in bacterial suspension. Lesion  
190 lengths and bacterial densities *in planta* measured 14 days after inoculation were  
191 comparable to wildtype PXO99 on Taipei 309 (TP309) rice plants, which lack *Xa21*  
192 (Figures 5A and 5C; Song et al., 1995). This indicates that deletion of genes encoding  
193 these putative transporters do not directly compromise *Xoo* virulence under the tested  
194 conditions.

195 We next tested the effect of the mutant strains on XA21-TP309 rice, a derivative  
196 of TP309 that expresses *Xa21* (Song et al., 1995), to assess XA21-dependent  
197 responses. As previously reported, XA21-TP309 rice were resistant to PXO99 infection  
198 and had short lesions (<5 cm) and low bacterial densities ( $6.8 \times 10^6$  CFU/leaf) *in planta*  
199 (Figures 5A-5C; Song et al., 1995). We observed that the  $\Delta raxB$  mutant formed short (<  
200 5 cm) to intermediate (6-9 cm) lesions on XA21-TP309, which varied between  
201 experiments, but the  $\Delta pctB$  mutant consistently formed short (<5 cm) lesions similar to  
202 PXO99 (Figures 5A and 5B). Both  $\Delta raxB$  and  $\Delta pctB$  single mutants accumulated to  
203 populations of  $\sim 4.5 \times 10^7$  CFU/leaf, roughly 6.6-fold higher than PXO99 (Figure 5C). In  
204 contrast, the  $\Delta raxB \Delta pctB$  double mutant formed long lesions (>14 cm) and  
205 accumulated to  $8.4 \times 10^8$  CFU/leaf, over 4- and 120-fold higher than the PXO99  
206 population, respectively (Figures 5A-5C). These phenotypes were comparable to the  
207  $\Delta raxX$  control (Figures 5A and 5C). Similarly, the  $\Delta raxA \Delta pctA$  double mutant,

208 containing mutations in genes for the predicted periplasmic adaptor proteins RaxA and  
209 PctA, formed longer lesions than the  $\Delta raxA$  and  $\Delta pctA$  single mutants (Figure S2).  
210 Collectively, these results suggest that sulfated RaxX is not secreted in both the  $\Delta raxA$   
211  $\Delta pctA$  and  $\Delta raxB \Delta pctB$  double mutants, allowing these strains to evade XA21. These  
212 results also suggest that PctA and PctB can partially compensate for the loss of RaxA  
213 and RaxB, respectively.

214

### 215 **RaxB is the primary PCAT required for RaxX maturation and secretion**

216 The  $\Delta raxB \Delta pctB$  double mutant accumulates to high population levels in XA21-  
217 TP309 plants (Figure 5C), indicating that this strain can evade detection by the XA21  
218 immune receptor. This result supports the hypothesis that these PCATs secrete sulfated  
219 RaxX. Given that *raxB* is genetically clustered with *raxX* (Figure 4A), we hypothesized  
220 that RaxB functions as the primary transporter of RaxX and is sufficient to activate XA21  
221 in the absence of PctB. To test this hypothesis, we complemented the  $\Delta raxB \Delta pctB$   
222 double mutant with *praxSTAB*, a broad host range vector expressing the entire  
223 *raxSTAB* operon with the presumptive native promoter. On XA21-TP309, the *praxSTAB*  
224 plasmid restored *raxB* gene expression as well as activation of XA21-mediated  
225 immunity, resulting in short lesions and bacterial densities comparable to wildtype  
226 PXO99 (Figures S3A, 5A and 5C). Similarly, *praxSTAB* restored the ability of the  $\Delta raxA$   
227  $\Delta pctA$  double mutant to activate XA21-mediated immunity (Figure S2). These results  
228 suggest that the RaxAB system is sufficient to secrete RaxX and activate XA21 in the  
229 absence of the PctAB system.

230 As a control, we also expressed *praxSTAB* in the wildtype PXO99 background.  
231 We observed no significant alterations on lesion development with the addition of  
232 *praxSTAB* (Figure S2), suggesting that overexpression of *raxSTAB* did not directly  
233 contribute to enhanced activation of the XA21-mediated immune response.

234 We next assessed, using SRM-MS, if mature RaxX was secreted in the  $\Delta$ *raxB*  
235  $\Delta$ *pctB* double mutant. RaxX was detected in the supernatant of the  $\Delta$ *raxB*  $\Delta$ *pctB* double  
236 mutant only in the presence of the *praxSTAB* plasmid (Figure 5D). We detected SRM  
237 transition peaks of mature RaxX in the *praxSTAB*-containing strain at the same  
238 retention time as wildtype PXO99 and the  $\Delta$ *raxX* mutant complemented with plasmid-  
239 expressed *raxX* (*praxX*) controls, which were collected and analyzed in the same batch  
240 (Figure S3B). Together, these results indicate that RaxB is a necessary and sufficient  
241 PCAT for RaxX maturation and secretion.

242 We also tested if PctB is sufficient to restore RaxX secretion in the  $\Delta$ *raxB*  $\Delta$ *pctB*  
243 double mutant. For this purpose, we transformed the  $\Delta$ *raxB*  $\Delta$ *pctB* double mutant with a  
244 broad host range vector expressing the *pctPB* cluster with its presumptive native  
245 promoter (*ppctPB*). The *ppctPB* plasmid restored *pctB* gene expression but failed to  
246 fully restore XA21-mediated recognition of the  $\Delta$ *raxB*  $\Delta$ *pctB* double mutant (Figures S3A  
247 and 5A). The *ppctPB*-complemented  $\Delta$ *raxB*  $\Delta$ *pctB* double mutant still formed  
248 intermediate-to-long lesions (~10 cm) roughly 3-fold longer than PXO99 (Figure 5A).  
249 This result suggests that PctB alone cannot effectively secrete RaxX to activate XA21-  
250 mediated immunity.

251

252 **RaxB and PctB carry conserved residues characteristic of bifunctional PCATs**

253 PCATs such as *E. coli* CvaB function as both a transporter and a protease  
254 (Håvarstein et al., 1995; Wu and Tai, 2004). The peptidase domain of this class of ABC  
255 transporters contains 2 conserved motifs: a cysteine (C) motif and histidine (H) motif  
256 (Figure 6A; Dirix et al., 2004; Håvarstein et al., 1995). We found that both RaxB and  
257 PctB contain sequences that match the conserved C- and H-motifs, including the  
258 conserved Cys, His, and Asp residues (Cys-28/12, His-101/85, Asp-117/101 of  
259 RaxB/PctB, respectively) predicted to form the active site catalytic triad (Figure 6A; Wu  
260 and Tai, 2004; Wu et al., 2012). Additionally, they contain the conserved Gln residue  
261 (Gln-22/6 of RaxB/PctB, respectively) proposed to form the oxyanion hole that stabilizes  
262 the Cys-His ion pair (Figure 6A; Ménard et al., 1991; Wu et al., 2012). In contrast, ABC  
263 transporters that have a degenerate C39-like domain (CLD) with no proteolytic activity,  
264 such as the *E. coli* hemolysin transporter HlyB, do not contain the catalytically essential  
265 Cys or conserved Gln (Figure 6A; Lecher et al., 2012). The presence of the complete  
266 Cys-His-Asp/Asn catalytic triad and conserved oxyanion hole Gln characteristic of  
267 bifunctional PCATs is consistent with the hypothesis that RaxB and PctB also possess  
268 proteolytic activity to process RaxX.

269

## 270 **Mutation of the RaxB peptidase domain catalytic triad impairs RaxX maturation** 271 **and secretion**

272 We next assessed the role of the RaxB peptidase domain in RaxX maturation.  
273 For these experiments, we transformed the  $\Delta raxB \Delta pctB$  double mutant with a derivative  
274 of *praxSTAB* containing site-directed missense substitutions of the active-site cysteine  
275 (Cys-28) or histidine (His-101) of the RaxB peptidase domain. Cys-28 was mutated to

276 Ser (C28S) and His-101 was mutated to Asp (H101D), which we hypothesized would  
277 abolish proteolytic activity by disrupting formation of the predicted Cys-28, His-101, Asp-  
278 117 catalytic triad as demonstrated with *E. coli* CvaB (Wu and Tai, 2004).

279 Expression of the C28S and H101D mutant derivatives impaired *praxSTAB*-  
280 complementation of the  $\Delta raxB \Delta pctB$  double mutant phenotype on XA21-TP309 but had  
281 no effect on the TP309 control plants (Figures 6B-6D). Wildtype *praxSTAB* fully  
282 complemented the  $\Delta raxB \Delta pctB$  double mutant phenotype on XA21-TP309, resulting in  
283 short lesions (<4 cm) and low bacterial densities ( $3.9 \times 10^7$  CFU/leaf). In contrast,  
284 expression of the mutated peptidase derivatives of *praxSTAB* resulted in long lesions  
285 (>9 cm) and high bacterial densities ( $10^8$  CFU/leaf) comparable to the strain without  
286 plasmid (Figures 6B-6D). These results indicate that the predicted RaxB peptidase  
287 domain is catalytically active and necessary to process and secrete biologically active  
288 RaxX.

289 To assess if mature RaxX is secreted into supernatants of the C28S or H101D  
290 RaxB peptidase mutants, we carried out SRM-MS analysis. We detected high SRM  
291 transition peaks corresponding to mature RaxX in supernatants of the  $\Delta raxB \Delta pctB$   
292 double mutant strain carrying wildtype *praxSTAB* (Figure 6E). In contrast, SRM  
293 transitions corresponding to mature RaxX were not detected in the  $\Delta raxB \Delta pctB$  double  
294 mutant carrying *praxSTAB* with either the C28S or H101D mutation (Figure 6E). We  
295 also failed to detect SRM transitions corresponding to mature RaxX in the  $\Delta raxX$   
296 negative control and the  $\Delta raxB \Delta pctB$  double mutant without plasmid (Figures S3B and  
297 6E). The lack of detectable secreted RaxX in the RaxB peptidase mutants supports our

298 inoculation results, providing further evidence that RaxB serves as the RaxX maturation  
299 protease.

300

### 301 **Mutation of the Gly-Gly cleavage site compromises RaxX maturation and** 302 **secretion**

303         The RiPP precursor typically carries a cleavable N-terminal leader that is  
304 removed by a protease (Figure 1A). PCATs cleave the N-terminal leader of substrates  
305 downstream of a GG-motif, which contains Gly-Gly or Gly-Ala immediately preceding  
306 the cleavage site (Håvarstein et al., 1994, 1995). Based on the observation that key  
307 residues in the RaxB catalytic peptidase domain are required for RaxX secretion (Figure  
308 6), we hypothesized that RaxX contains an N-terminal GG-motif that is removed by  
309 RaxB. In support of this hypothesis, our SRM-MS analysis indicated that the N-terminal  
310 39 residues of RaxX are removed prior to secretion (Figure 3). We noted that this leader  
311 peptide ends with three conserved glycines and contains conserved hydrophobic  
312 residues at positions -4, -7, -12, and -15 distal to the cleavage site, a pattern typical of  
313 PCAT substrates and necessary for interaction with the peptidase (Figures 3A, 7A and  
314 S4A; Aucher et al., 2005; Kotake et al., 2008). These observations suggest that the  
315 predicted RaxX leader resembles the leader of GG-motif-containing peptides typically  
316 processed and secreted by PCATs.

317         Studies of the peptide mesentericin Y105 (MesY) produced by *Leuconostoc*  
318 *mesenteroides* indicate that the GG-motif preceding the MesY cleavage site is critical  
319 for efficient processing and secretion (Aucher et al., 2005). Based on this observation,  
320 we hypothesized that the GG-motif in the predicted RaxX leader sequence is critical for

321 RaxB-mediated processing of RaxX. To test this hypothesis, we generated site-directed  
322 missense substitutions of the conserved glycine residues (37-39) preceding the  
323 cleavage site of RaxX. As Aucher et al. (2005) demonstrated that secretion of MesY  
324 was significantly reduced or completely abolished when Gly at the -2 position from the  
325 cleavage site was mutated to Ala or Asp or when Gly at the -1 position from the  
326 cleavage site was mutated to Arg or Asp, we generated homologous missense  
327 substitutions of RaxX Gly-(37-39). As a control, we also generated missense  
328 substitutions of Gly-Ala pairs further upstream of the cleavage site: Gly-11, Ala-12 and  
329 Gly-20, Ala-21. These mutant variants of RaxX were expressed as derivatives of the  
330 *praxX* plasmid in the  $\Delta$ *raxX* mutant background.

331 The resulting mutants were inoculated onto rice plants. These mutants formed  
332 long (>12 cm) lesions comparable to PXO99 on the TP309 control plants (Figures 7B,  
333 S4B, and S4C). On XA21-TP309,  $\Delta$ *raxX* formed long lesions (>15 cm) and this  
334 phenotype was complemented to short lesions by *praxX* as previously reported (Figures  
335 7B, S4B, and S4C; Pruitt et al., 2015). Similarly, *praxX* derivatives containing mutations  
336 in RaxX residues Gly-11, Ala-12, Gly-20, or Ala-21 still complemented the  $\Delta$ *raxX* mutant  
337 phenotype (Figures S4B and S4C). This result suggests that these residues are not  
338 necessary for processing nor secretion of RaxX. In contrast, *praxX* derivatives  
339 containing mutations in Gly-(37-39) were impaired in their ability to complement the  
340  $\Delta$ *raxX* mutant phenotype (Figures 7B, S4B, and S4C). Expression of the G37D and  
341 G38A derivatives resulted in intermediate lesions (11-12 cm) but the G38D, G38R, and  
342 G39D derivatives resulted in long lesions (>15 cm) similar to the  $\Delta$ *raxX* mutant without  
343 plasmid control (Figures 7B, S4B, and S4C). Bacterial densities were also comparable

344 among the  $\Delta$ *raxX* mutant and the G38D and G39D-expressing strains (Figure 7C).  
345 These results suggest that Gly-(37-39), which immediately precede the cleavage site,  
346 are essential for RaxX maturation and/or secretion.

347 We next assessed if we could detect secreted RaxX in supernatants of *Xoo*  
348 strains carrying mutations in the leader peptide. We did not detect SRM transitions of  
349 RaxX above background levels in supernatants of the  $\Delta$ *raxX* mutant carrying the G38D  
350 and G39D derivatives (Figure 7D), suggesting that RaxX is neither processed nor  
351 secreted when Gly-38 or Gly-39 is mutated to Asp. In contrast, we detected RaxX in  
352 supernatants of the  $\Delta$ *raxX* mutant carrying the G37D *praxX* derivative although at  
353 reduced levels compared to expression of wildtype *praxX* ( $1.5 \times 10^3$  vs.  $5.8 \times 10^3$  total  
354 peak area, respectively; Figure 7E). The accumulation of intermediate amounts of RaxX  
355 peptide secreted from the G37D mutant strain is consistent with the formation of  
356 intermediate lesion lengths on XA21-TP309 plants inoculated with this strain (Figures  
357 7B and 7E). Taken together, our results suggest that proper RaxX maturation and  
358 secretion, which require the Gly-38, Gly-39 cleavage site, are necessary steps in the  
359 biogenesis of the immunogenic peptide.

360

## 361 **DISCUSSION**

362

### 363 **Tyrosine sulfation of RaxX enhances XA21 binding**

364 RaxX immunogenicity is dependent on sulfation of Tyr-41 (Pruitt et al., 2015).  
365 Our MST results demonstrate that this modification increases the affinity of RaxX  
366 binding to XA21<sup>ECD</sup> (Figure 2), resulting in a  $K_D$  comparable to the RaxX concentration



367 needed to trigger the half maximal immune response of XA21 (~20 nM) and induce root  
368 growth (Pruitt et al., 2015, 2017). Tyrosine sulfation has similarly been observed to  
369 enhance interaction of the disulfated pentapeptide phytosulfokine (PSK) with its cognate  
370 receptor PSKR1 in *Arabidopsis* and carrot. Based on crystal structure studies, the two  
371 sulfate groups on PSK form hydrogen bonds and van der Waals packing with residues  
372 on PSKR1 (Wang et al., 2015). This sulfate group-mediated interaction stabilizes  
373 PSKR1, which in turn allosterically induces heterodimerization with the SERK (somatic  
374 embryogenesis receptor-like kinase) co-receptor, resulting in activation of PSKR1  
375 (Wang et al., 2015). Analogous structural studies will provide insights into how sulfation  
376 of RaxX Tyr-41 contributes to the RaxX-XA21 interaction.

377

### 378 **RaxX shares similarities to RiPPs**

379 RaxX is predicted to mimic the activity of the plant peptide hormone PSY1 (Pruitt  
380 et al., 2017). Our results indicate that RaxX is ribosomally synthesized as a precursor  
381 that is proteolytically processed by RaxB into a mature peptide (Figure 1B). This mature  
382 RaxX peptide includes the same residues covered by RaxX16, which is sufficient to  
383 activate XA21-mediated immunity and promote root growth in rice (Figure 3A; Pruitt et  
384 al., 2017). These residues also precisely overlap the conserved 13-residue region found  
385 in mature PSY1 from *Arabidopsis* and in putative PSY-like proteins from various plant  
386 species including rice (Amano et al., 2007; Pruitt et al., 2017). Furthermore, the mature  
387 RaxX and PSY1 peptides start with the same residues, Asp-Tyr, with the critical sulfated  
388 tyrosine at the same position. Mature RaxX therefore intimately resembles host PSY-  
389 like proteins.

390           The small size (<10 kDa), presence of a post-translational modification (sulfated  
391 tyrosine in this case), and proteolytic maturation of RaxX and PSY1 are defining  
392 characteristics of RiPPs (Arnison et al., 2013). In addition to PSY1, plants produce other  
393 secreted tyrosine-sulfated peptides that regulate plant growth including PSK, root  
394 meristem growth factor (RFG), and Casparian strip integrity factor (CIF) (Matsubayashi  
395 and Sakagami, 1996; Matsuzaki et al., 2010; Doblaz et al., 2017; Nakayama et al.,  
396 2017). Similar to RaxX and PSY1, PSK, RFG, and CIF are proteolytically processed  
397 from larger precursor peptides and secreted. We therefore propose that these peptides  
398 be classified as RiPPs.

399           RiPPs are subdivided into over 20 groups according to their biosynthetic  
400 machinery and structural features imparted primarily by the post-translational  
401 modification(s) that decorate the core (Arnison et al., 2013). However, more groups  
402 continue to be added as new RiPPs are identified. Given the similarities of RaxX, PSY1,  
403 PSK, RFG, and CIF, we propose that these peptides be classified as a new group of  
404 RiPPs defined by the presence of the sulfated tyrosine.

405

#### 406 **Does PctB process and secrete other RiPPs?**

407           Our results indicate that RaxAB is the cognate RaxX maturation and secretion  
408 system and can be partially complemented by PctAB. This functional redundancy is  
409 rather unusual given the low sequence identity shared between the two systems, which  
410 are also independently distributed among Xanthomonads. For instance, the *X.*  
411 *albilineans* genome contains *pctAPB* but not *raxX* nor *raxSTAB*, whereas the *X.*

412 *euvesicatoria* genome contains *raxX* and *raxSTAB* but not *pctAPB*. These observations  
413 suggest that RaxX is not the cognate substrate for PctB.

414 Because PctB is predicted to have a functional C39 peptidase domain (Figure  
415 6A), we hypothesize that its cognate substrate is a GG-motif-containing peptide. Based  
416 on the annotated PXO99 sequence (NC\_010717.2), two hypothetical genes,  
417 PXO\_RS14845 and PXO\_RS14850 (here referred to as *pct-92* and *pct-75*,  
418 respectively), are encoded upstream of *pctA* (Figure 4B). *pct-92* and *pct-75* are  
419 predicted to encode 92- and 75-residue peptides, respectively, that contain a GG-like  
420 leader of 28 and 19 amino acids, respectively (Figure S4A). If Pct-92 and Pct-75 are  
421 both PctB substrates, then this would suggest that PctB can tolerate leaders that vary in  
422 sequence and length. Such substrate tolerance has been observed in PCATs such as  
423 LagD, HalT, and LicT from *Lactococcus lactis*, *Bacillus halodurans*, and *B. licheniformis*,  
424 respectively, which process and transport two cognate peptides that function together  
425 as a two-component antimicrobial molecule (Caetano et al., 2014; Håvarstein et al.,  
426 1995; Lawton et al., 2007). Because the leader of the two peptide components can vary  
427 in sequence and length (Figure S4A), these transporters exhibit a relaxed specificity  
428 and sometimes tolerate noncognate substrates (Caetano et al., 2014). This may explain  
429 why PctB is able to tolerate RaxX, at least to some extent. However, we have yet to  
430 confirm that *pct-92* and *pct-75* encode actual peptides. It is also unclear if these putative  
431 peptides are post-translationally modified as no known modification enzymes are  
432 encoded in the same genomic region (Figure 4B). Therefore, further studies are needed  
433 to analyze these putative PctB substrates and identify essential determinants that allow  
434 PctB to distinguish substrates.

435

436 **Does the RaxX leader peptide have functional roles in RiPP biosynthesis other**  
437 **than peptidase recognition?**

438 In the RaxX leader peptide, residues proximal to the peptidase cleavage site are  
439 well conserved in *raxX* alleles from all *Xanthomonas* species (Figure 7A). This includes  
440 Gly-38 and Gly-39 preceding the cleavage site, which are critical for proper RaxX  
441 maturation and secretion (Figure 6), as well as the hydrophobic residues that occupy  
442 positions -4, -7, and -12 from the cleavage site (Val-36, Trp-33, and Leu-28,  
443 respectively), which are proposed to position the Gly-Gly cleavage site in the enzyme's  
444 active site (Ishii et al., 2010). These features are also conserved in leaders of PCAT  
445 substrates, including RiPPs and unmodified peptides (Figure S4A), suggesting that this  
446 region of the RaxX leader is important for recognition by the RaxB and PctB peptidase  
447 domain. However, it is unclear if sulfation of RaxX, which occurs one residue from the  
448 cleavage site, is required for recognition by RaxB or possibly impairs recognition by  
449 PctB.

450 Because many unmodified peptides have a shorter leader peptide, the extended  
451 N-terminus of RaxX may have other functional roles aside from maturation and  
452 secretion that we have yet to identify.

453 One proposed role of the leader peptide is to keep the precursor inactive during  
454 biosynthesis as demonstrated for *Lactococcus lactis* lacticin 481, an antimicrobial RiPP  
455 of the lanthipeptide class (Xie et al., 2004). However, the observation that exogenous  
456 application of RaxX60, representing the full-length precursor peptide, is able to activate  
457 XA21-dependent immune responses (Pruitt et al., 2015) and promote root growth in

458 *Arabidopsis* and rice (unpublished data), does not support a role for the RaxX leader in  
459 maintenance of an inactive state.

460 Another possibility is that the leader peptide serves as a recognition motif for  
461 post-translational modification enzymes. We previously detected sulfated non-  
462 processed RaxX in *Xoo* cell lysates (Pruitt et al., 2015), suggesting that sulfation occurs  
463 while the leader is attached. However, under *in vitro* conditions, RaxST can sulfate a  
464 peptide derivative of human CCR5, containing only an aspartate preceding the tyrosine  
465 (Han et al., 2012). This result suggests that the RaxX leader is not required for RaxST  
466 function. Similarly, the lactacin 481 precursor LctA, which is post-translationally modified  
467 by dehydration and cyclization reactions catalyzed by LctM, does not require the leader  
468 for its modification (Levengood et al., 2007). Instead, the presence of the leader peptide  
469 promotes the efficiency of LctM modification of the LctA core peptide even when  
470 supplemented *in trans* as a synthetic peptide (Levengood et al., 2007) or covalently  
471 fused to LctM (Oman et al., 2012). Further studies are needed to determine if the RaxX  
472 leader helps recruit RaxST or enhance its sulfotransferase activity in an analogous  
473 manner.

474

#### 475 **Knowledge of RiPP biosynthesis can be used to engineer a diversity of tyrosine** 476 **sulfated molecules**

477 *raxX* is genetically clustered with *raxST*, *raxA* and *raxB*, which are each involved  
478 in its biosynthesis. The simplicity of the RaxX biosynthetic machinery makes it an ideal  
479 system to study how sulfation affects substrate specificity and activity of the biosynthetic  
480 proteins. This information can provide insights into the development of strategies to

481 engineer new tyrosine sulfated molecules such as hybrid RiPP products. Burkhart et al.  
482 (2017) used such an approach to demonstrate that sequences recognized by unrelated  
483 RiPP modification enzymes, including thiazoline-forming cyclodehydratases and  
484 lanthipeptide synthetases, can be combined into a single chimeric leader within a  
485 precursor peptide. Co-expression of this chimeric construct with the appropriate  
486 modification enzymes led to the production of hybrid RiPPs *in vivo*. With the addition of  
487 leader-independent “tailoring” modification enzymes, the chemical diversity of these  
488 hybrid RiPPs can be further extended. We envision that the Rax system can be similarly  
489 exploited to increase the chemical diversity and potency of sulfated molecules that may  
490 be useful as therapeutic agents to suppress infection or activate the immune response  
491 of plants and animals.

492

## 493 **Conclusion**

494 Here we show that PCAT processing is required for both the maturation and  
495 export of bacterial RaxX, an immunogen that binds a eukaryotic receptor. These results  
496 suggest that RaxX is a tyrosine sulfated RiPP, a group not previously described. We  
497 further identified and defined the RaxX leader, which contains residues that are critical  
498 for its maturation and secretion. These results set the stage for leader peptide-guided  
499 biosynthetic strategies to extend the chemical diversity of hybrid RiPPs.

500

## 501 **MATERIALS AND METHODS**

502

### 503 **Peptides**

504 Tyrosine sulfated (sY) and/or nonsulfated (nY) versions of RaxX13  
505 (DYPPPGANPKHDP), RaxX16 (DYPPPGANPKHDPPPR), and RaxX21  
506 (HVGGGDYPPPGANPKHDPPPR) were synthesized. The synthetic peptides were  
507 ordered from Pacific Immunology (Ramona, CA), with the exception of RaxX16, which  
508 was ordered from Peptide 2.0 (Chantilly, VA). Tyrosine sulfated PSY1 was synthesized  
509 by the Protein Chemistry Facility at the Gregor Mendel Institute. All of the peptides were  
510 resuspended in ddH<sub>2</sub>O. Recombinant full-length RaxX (RaxX60-sY and RaxX60-nY)  
511 was isolated from an engineered *E. coli* strain using an expanded genetic code  
512 approach as previously described (Pruitt et al., 2015).

513

#### 514 **XA21<sup>ECD</sup> expression and purification**

515 The extracellular domain (ECD) of XA21 (residues 23 - 649) was amplified using  
516 primers listed in Table S2 and inserted into the baculovirus transfer vector pMelBac B1  
517 (Invitrogen, Carlsbad, CA) using RecA-mediated Sequence and Ligation Independent  
518 Cloning (SLIC) strategy (Scholz et al., 2013). A C-terminal Strep II-9xHis tag was fused  
519 to XA21<sup>ECD</sup> and verified by Sanger Sequencing. XA21<sup>ECD</sup>-StrepII-9xHis was produced  
520 by secreted expression in baculovirus-infected High Five insect cells, harvested 72  
521 hours post-infection. Subsequently, the protein was affinity purified by Ni-NTA  
522 chromatography (Ni Sepharose excel, GE Healthcare, Chicago, IL) and subjected to  
523 size-exclusion chromatography column (Superdex 200 16/60, GE Healthcare) pre-  
524 equilibrated with 50 mM NaH<sub>2</sub>PO<sub>4</sub>/Na<sub>2</sub>HPO<sub>4</sub> pH 7.5, 200 mM NaCl, 5% Glycerol. All of  
525 the purification steps were checked by SDS-PAGE.

526

527 **Microscale thermophoresis (MST)**

528 Purified XA21<sup>ECD</sup> was labelled with a fluorescent dye using Monolith™ Protein Labelling  
529 Kit RED-NHS (Amine Reactive; NanoTemper Technologies, San Francisco, CA).  
530 Fluorescently-labelled XA21<sup>ECD</sup> (at constant concentration 0.0133 μM) was mixed with  
531 varying peptide concentrations (ranging from 0.00006 to 2 μM) in buffer containing 50  
532 mM NaH<sub>2</sub>PO<sub>4</sub>/Na<sub>2</sub>HPO<sub>4</sub> pH 7.5, 200 mM NaCl, 5% Glycerol and 0.001% Tween.  
533 Approximately 4-6 μL of each sample was loaded in a fused silica capillary  
534 (NanoTemper Technologies). Measurements were performed at room temperature in a  
535 Monolith NT.115 instrument at a constant LED power of 65% and MST power of 60%.  
536 Measurements were performed repeatedly on independent protein preparations to  
537 ensure reproducibility. The data were analysed by plotting peptide concentrations  
538 against percent changes of normalized fluorescence. Curve fitting was performed using  
539 PALMIST software (Scheuermann et al., 2016).

540

541 **Bacterial strains and culture**

542 A list of bacterial strains used in this study are provided in Table S1. *Escherichia coli*  
543 DH5α, which was used for general cloning, was cultured in lysogeny broth (LB) with the  
544 appropriate antibiotics at 37°C (shaking at 230 rpm for liquid cultures). *Xoo* strains were  
545 routinely cultured at 28°C on peptone sucrose agar (PSA) with the appropriate  
546 antibiotics unless otherwise indicated. Nutrient broth or agar was initially used to  
547 generate the mutant strains. When needed, sucrose was added to a final concentration  
548 of 5% and antibiotics were added. For proteomic analysis, cells were grown on XOM2



549 (Tsuge et al., 2002) agar, a plant-mimicking medium. Cephalexin was used at 20  
550  $\mu\text{g}/\text{mL}$ , kanamycin at 50  $\mu\text{g}/\text{mL}$ , and geneticin at 50  $\mu\text{g}/\text{mL}$ .

551

## 552 **Protein extraction**

553 *Xoo* proteins were prepared from strains grown on XOM2 agar plates, which was found  
554 to induce *raxX* expression. After incubation at 28°C for 2 days, the fully-grown cells  
555 were scraped from the plates and re-suspended in 30 mL of water to loosen the  
556 extracellular polysaccharide matrix containing the secretome. The cells were pelleted by  
557 centrifugation (12k rpm, 45 min, 4°C). The supernatants, which contained the secreted  
558 proteins, were harvested and concentrated to 0.5-1 mL using Amicon® Ultra Centrifugal  
559 Filters Ultracel®-3K (Millipore, Burlington, MA, cat#UFC900324). Total protein was also  
560 extracted from the cell pellet. The cells were resuspended and lysed by sonication in  
561 lysis buffer (25mM Tris pH 8, 300mM NaCl, 1mM PMSF, 2.5 mM EDTA, and 1mg/ml  
562 lysozyme). Soluble proteins were separated by centrifugation (12k rpm, 45 min, 4°C).

563 All of the samples for mass spectrometry were digested with 1  $\mu\text{g}$  of trypsin  
564 (Promega, Madison, WI) in the presence of 5 mM DTT. The tryptic peptides were  
565 desalted with a C18 column (Harvard apparatus, Holliston, MA, cat#74-4601) and  
566 eluted with 80 % acetonitrile, 0.1 % formic acid.

567

## 568 **LC-SRM-MS Analysis**

569 The SRM targeted proteomic assays were performed, as described previously (Batth et  
570 al., 2014), on an Agilent 6460 QQQ mass spectrometer system coupled with an Agilent  
571 1290 UHPLC system (Agilent Technologies, Santa Clara, CA). Peptides were separated

572 on an Ascentis Express Peptide C18 column [2.7-mm particle size, 160-Å pore size, 5-  
573 cm length × 2.1-mm inside diameter (ID), coupled to a 5-mm × 2.1-mm ID guard column  
574 with same particle and pore size, operating at 60°C; Sigma-Aldrich, St. Louis, MO]  
575 operated at a flow rate of 0.4 ml/min via the following gradient: initial conditions were  
576 95% solvent A (0.1% formic acid), 5% solvent B (99.9% acetonitrile, 0.1% formic acid).  
577 Solvent B was increased to 35% over 5 min, and was then increased to 80% over 0.2  
578 min, and held for 2 min at a flow rate of 0.6 mL/min, followed by a ramp back down to  
579 5% B over 0.5 min where it was held for 1.5 min to re-equilibrate the column to original  
580 conditions. The eluted peptides were ionized via an Agilent Jet Stream ESI source  
581 operating in positive ion mode with the following source parameters: gas temperature =  
582 250°C, gas flow = 13 liters/min, nebulizer pressure = 35 psi, sheath gas temperature =  
583 250°C, sheath gas flow = 11 liters/min, capillary voltage = 3500 V, nozzle voltage = 0 V.  
584 The data were acquired using Agilent MassHunter version B.08.02. Acquired SRM data  
585 were processed by using Skyline software version 3.70 (MacCoss Lab Software,  
586 Seattle, WA).

587

## 588 **Immunoblotting**

589 The proteins were separated by SDS-PAGE, transferred to PVDF membranes (Bio Rad,  
590 Hercules, CA cat#162-0177) by electrophoresis and then analyzed by immunoblot using  
591 standard procedures. RaxX was detected using an anti-RaxX antibody that was raised  
592 in rabbit against RaxX11 (PPGANPKHDPP), derived from residues 43-53 of the 60-  
593 residue RaxX precursor (GenScript, Piscataway, NJ). Alkaline phosphatase conjugated  
594 anti-rabbit IgG (Sigma, cat#A3687) was used as secondary antibody and CDP-*Star*

595 (Roche, Basel, Switzerland, cat#12041677001) was used as substrate. The anti-RaxX  
596 and anti-rabbit IgG antibodies were used at dilutions of 1:2000 and 1:20,000,  
597 respectively. The membranes were exposed to X-ray films or visualized using the Gel-  
598 Doc XR<sup>+</sup> system (Bio-Rad).

599

### 600 **Identification of the *pct* locus**

601 PctB (PXO\_RS14825) was identified by NCBI Protein BLAST analysis of the PXO99  
602 genome (NC\_010717.2) using the RaxB (PXO\_RS06015) N-terminal 150 residues as  
603 query under the default settings. PctP (PXO\_RS14830) and PctA (PXO\_RS14840)  
604 were identified by algorithms from NCBI in the rhomboid family (CDD:304416) and the  
605 type\_I\_hyd (CDD:330454) domain classification, respectively. Pct-92 (PXO\_RS14845)  
606 and Pct-75 (PXO\_RS14850) were annotated as hypothetical proteins.

607

### 608 **Xoo mutation and complementation**

609 Xoo mutants were generated in the Philippine race 6 strain PXO99<sup>A</sup> (referred to as  
610 PXO99 in this manuscript; Hopkins et al., 1992). The mutant strain  $\Delta$ raxX and the  
611 complemented strain  $\Delta$ raxX(*praxX*) used in this study were previously reported (Pruitt et  
612 al., 2015). The rest of the mutant strains:  $\Delta$ raxB,  $\Delta$ pctB,  $\Delta$ raxB  $\Delta$ pctB,  $\Delta$ raxA,  $\Delta$ pctA,  
613 and  $\Delta$ raxA  $\Delta$ pctA, were generated by double homologous recombination using the  
614 pUFR80 suicide vector (Castañeda et al., 2005). Briefly, two flanking sequences  
615 upstream and downstream of the target gene were independently PCR-amplified with  
616 their respective primer sets A, B and C, D (Table S2) using Phusion High-Fidelity DNA  
617 polymerase (Thermo Scientific, Waltham, MA). Both PCR products were fused together

618 by overlap extension PCR (Horton et al., 1989) using external primers A and D. This  
619 PCR product was then cloned into pUFR80 using the sites EcoRI/HindIII or  
620 BamHI/HindIII. The resultant plasmids, which were verified by sequencing, were  
621 electroporated into PXO99 ( $\Delta raxB$  or  $\Delta raxA$  was used instead for generation of the  
622  $\Delta raxB \Delta pctB$  or  $\Delta raxA \Delta pctA$  double mutant, respectively). The electroporated cells  
623 were then plated onto nutrient agar (NA) with kanamycin (50  $\mu\text{g}/\text{mL}$ ) and grown at 28°C  
624 for 5-6 days. Positive integrants were screened by PCR, grown in nutrient broth without  
625 kanamycin overnight, and then plated onto NA containing 5% sucrose to select for the  
626 second crossover event. Colonies were analyzed by PCR to identify deletion mutants  
627 and verified by sequencing the PCR product.

628 For complementation, all of the plasmids (listed in Table S3) were constructed  
629 using standard recombinant DNA techniques using the primers listed in Table S2.  
630 *praxX-ha* was generated by cloning the *raxX* coding sequence into pENTR/D-TOPO  
631 (Invitrogen, Carlsbad, CA), which was then recombined into pLN615, a gateway  
632 destination vector containing an HA tag (Guo et al., 2009). *praxSTAB* and *ppctPB* were  
633 derived from pVSP61 (Loper and Lindow, 1994), into which the indicated gene clusters  
634 and 0.4 kb of the upstream sequence, presumed to contain the native promoter, were  
635 cloned. Expression of *raxSTAB* and *pctPB* were chosen instead of independent  
636 expression of *raxB* and *pctB*, respectively, to account for potential translational coupling  
637 with *raxA* and *pctP*, respectively. Site-directed mutagenesis of catalytic residues of the  
638 RaxB peptidase domain and residues of the RaxX leader were generated in *praxSTAB*  
639 and *praxX*, respectively. All of the plasmids were verified by sequencing. The plasmids  
640 were transformed into *Xoo* competent cells by electroporation, plated onto PSA with the

641 appropriate antibiotic, and grown at 28°C. Colonies were analyzed by PCR and verified  
642 by sequencing the PCR product.

643

#### 644 **Rice plants**

645 The *Oryza sativa* ssp. *japonica* rice variety TP309 and a transgenic TP309 line derived  
646 from I106-17 (XA21-TP309), which carries the *Xa21* gene driven by its own promoter  
647 (Song et al., 1995) were used for rice inoculations. Native TP309 does not contain  
648 *Xa21*. TP309 and XA21-TP309 rice plants were grown as previously described (Pruitt et  
649 al., 2015). Briefly, seeds were germinated in distilled water at 28°C for 1 week then  
650 transplanted to sandy soil in 5.5-inch square pots (3 seedlings per pot). Plants were  
651 grown in tubs filled with fertilizer water in a greenhouse. Six-week old plants were then  
652 transferred to a growth chamber at least 2 days prior to inoculation. The growth  
653 chamber was set to 28°C/24°C, 80%/85% humidity, and 14/10-hour lighting for the  
654 day/night cycle.

655

#### 656 **Rice inoculation**

657 *Xoo* strains were cultured on PSA plates with appropriate antibiotics at 28°C. Bacteria  
658 from the plates were resuspended in sterile water at a density of 10<sup>8</sup> colony-forming  
659 units (CFU)/mL and then inoculated onto rice plants using the scissor clipping method  
660 (Kauffman, 1973). Briefly, surgical scissors were dipped in bacterial suspension and  
661 used to clip the tips of the two uppermost expanded leaves in each tiller, representing  
662 one biological replicate. The length (cm) of the water-soaked lesions extending from the  
663 site of inoculation were measured 14 days after inoculation. The lesions of at least 8

664 biological replicates, each a mean of the lesions formed on the two leaves, were  
665 measured. At least 3 independent experiments were performed with similar results  
666 unless indicated otherwise.

667 Analysis of bacterial growth *in planta* was performed as previously described  
668 (Bahar et al., 2014) with minor modifications. Briefly, leaves (10-cm section from the site  
669 of inoculation) were harvested for each sample set at each time point. The two leaf  
670 sections from each tiller, representing one biological replicate, were cut to 2 mm pieces  
671 and incubated in sterile water for 2 hours at 28°C shaking at 230 rpm. This suspension  
672 was serially diluted, plated onto PSA plates with cephalixin (20 µg/mL), and incubated  
673 at 28°C. Colonies were counted 2 days later and the cell number per 10-cm leaf section  
674 was calculated. Three to four biological replicates, each a mean number of colonies  
675 from 4 technical replicates, were measured for each data point. Three independent  
676 experiments were performed with similar results.

677 For *in planta* bacterial gene expression analysis, TP309 leaves were harvested 6  
678 days after inoculation. The leaves were cut 4 cm from the site of inoculation and the 4-  
679 cm section from two leaves of each tiller, representing one biological replicate, were  
680 snap-frozen in liquid nitrogen and processed as described below.

681

## 682 **RNA Extraction and RT-qPCR**

683 Total RNA was extracted from homogenized rice leaf tissue using TRIzol reagent  
684 (Invitrogen) following the manufacturer's instructions and then treated with the TURBO  
685 DNA-free kit (Ambion) to remove residual genomic DNA. cDNA was synthesized using  
686 the High-Capacity cDNA Reverse Transcription Kit (Applied Biosystems, Foster City,

687 CA) according to the manufacturer's instructions. Quantitative PCR (qPCR) was  
688 performed on a Bio-Rad CFX96 Real-Time System coupled to a C1000 Thermal Cycler  
689 (Bio-Rad) using the iTaq Universal SYBR Green Supermix (Bio-Rad) and 100 ng of  
690 cDNA. The primers used are listed in Table S2. The  $2^{(-\Delta\Delta Ct)}$  method was used to  
691 calculate the relative changes in gene expression normalized to the *ampC2* reference  
692 gene control and the PXO99 wildtype strain. Three biological replicates, each a mean of  
693 two technical replicates, were analyzed. Three independent experiments were  
694 performed with similar results.

695

#### 696 **Sequence analysis and visualization**

697 The C- and H-motifs of the RaxB and PctB peptidase domains were identified from  
698 alignments of the peptidase domain of the *E. coli* colicin V transporter CvaB  
699 (CAA40744.1; Wu and Tai, 2004), the *Leuconostoc mesenteroides* mesentericin B105  
700 and Y105 transporter MesD (CAA57402.1; Aucher et al., 2005; Morisset and Frère,  
701 2002), the *Streptococcus pneumoniae* competence-stimulating peptide transporter  
702 ComA (AAA69510.1; Ishii et al., 2006), the *Lactococcus lactis* lactococcin G transporter  
703 LagD (ACR43772.1; Håvarstein et al., 1995), the *Lactococcus lactis* lacticin 481  
704 transporter LctT (AAC72259.1; Furgerson Ihnken et al., 2008), and the *Staphylococcus*  
705 *warneri* nukacin ISK-1 transporter NukT (NP\_940774.2; Nishie et al., 2009), as well as  
706 the peptidase-like domain of the *Aggregatibacter actinomycetemcomitans* leukotoxin  
707 transporter LktB (CAA37906.1; Guthmiller et al., 1995), and the *E. coli* alpha-hemolysin  
708 transporter HlyB (KKA61973.1; Lecher et al., 2012). The alignment was performed

709 using the default settings in Clustal Omega (European Bioinformatics Institute; EMBL-  
710 EBI; Sievers et al., 2011).

711 The sequence logo of the RaxX leader was constructed using WebLogo (Crooks  
712 et al., 2004) with the predicted leader sequence of RaxX alleles from various  
713 *Xanthomonas* species identified by Pruitt et al. (2017). The RaxX leader was aligned  
714 with the predicted leader of the candidate PctB substrates Pct-92 and Pct-75 as well as  
715 the experimentally verified leader sequences from the *E. coli* colicin V precursor CvaC  
716 (AAX22078.1; Håvarstein et al., 1994), the *Leuconostoc mesenteroides* mesentericin  
717 B105 and Y105 precursors MesB and MesY (AAD54223.1 and AAP37395.1,  
718 respectively; Morisset and Frère, 2002; Aucher et al., 2005); the *Streptococcus*  
719 *pneumoniae* competence-stimulating peptide precursor ComC (AAC44895.1; Ishii et al.,  
720 2006), the *Lactococcus lactis* lactococcin alpha and beta precursors LagA and LagB,  
721 respectively (ACR43769.1 and ACR43770.1, respectively; Håvarstein et al., 1995), the  
722 *Lactococcus lactis* lacticin 481 precursor LctA (AAC72257.1; Furgerson Ihnken et al.,  
723 2008), and the *Staphylococcus warneri* nukacin ISK-1 precursor NukA (NP\_940772.1;  
724 Nishie et al., 2009).

725

## 726 **Statistical analysis**

727 Statistical analysis was performed using JMP Pro 13 (SAS Institute Inc., Cary, NC) or  
728 GraphPad Prism 7 (GraphPad Software, La Jolla, CA) and specified in figure legends.  
729 Differences were considered to be significant when  $p < 0.05$ .

730

## 731 **ACKNOWLEDGMENTS**



732

733 This work was supported by NIH GM59962, NIH GM122968, and NSF PGRP grant  
734 IOS-1237975. This work was also partially supported by the Office of Biological and  
735 Environmental Research's Genomic 275 Science program within the U.S. Department  
736 of Energy Office of Science, under award number DE-AC02-05CH11231.

737

### 738 **AUTHOR CONTRIBUTIONS**

739

740 D.D.L., A.J., O.B., C.P., Y.B., and P.C.R. conceived and designed the research. D.D.L.,  
741 A.J., Y.C., K.P., R.P., L.C., K.L., and C.A. performed experiments. D.D.L., A.J., Y.C.,  
742 K.P., and V.S. analyzed data. D.D.L., A.J., V.S., and P.C.R. wrote the manuscript with  
743 assistance and feedback from the other authors.

744

### 745 **DECLARATION OF INTERESTS**

746

747 The authors declare no competing interests.

748

### 749 **REFERENCES**

750

751 Amano, Y., Tsubouchi, H., Shinohara, H., Ogawa, M., and Matsubayashi, Y. (2007).  
752 Tyrosine-sulfated glycopeptide involved in cellular proliferation and expansion in  
753 Arabidopsis. *Proc. Natl. Acad. Sci.* *104*, 18333–18338.

754 Arnison, P.G., Bibb, M.J., Bierbaum, G., Bowers, A.A., Bugni, T.S., Bulaj, G., Camarero,  
755 J.A., Campopiano, D.J., Challis, G.L., Clardy, J., et al. (2013). Ribosomally  
756 synthesized and post-translationally modified peptide natural products: overview and  
757 recommendations for a universal nomenclature. *Nat. Prod. Rep.* 30, 108–160.

758 Aucher, W., Lacombe, C., Héquet, A., Frère, J., and Berjeaud, J.M. (2005). Influence of  
759 amino acid substitutions in the leader peptide on maturation and secretion of  
760 mesentericin Y105 by *Leuconostoc mesenteroides*. *J. Bacteriol.* 187, 2218–2223.

761 Bahar, O., Pruitt, R., Luu, D.D., Schwessinger, B., Daudi, A., Liu, F., Ruan, R.,  
762 Fontaine-Bodin, L., Koebnik, R., and Ronald, P. (2014). The *Xanthomonas* Ax21  
763 protein is processed by the general secretory system and is secreted in association  
764 with outer membrane vesicles. *PeerJ* 2, e242.

765 Batth, T.S., Singh, P., Ramakrishnan, V.R., Sousa, M.M.L., Chan, L.J.G., Tran, H.M.,  
766 Luning, E.G., Pan, E.H.Y., Vuu, K.M., Keasling, J.D., et al. (2014). A targeted  
767 proteomics toolkit for high-throughput absolute quantification of *Escherichia coli*  
768 proteins. *Metab. Eng.* 26, 48–56.

769 Burkhart, B.J., Kakkar, N., Hudson, G.A., van der Donk, W.A., and Mitchell, D.A. (2017).  
770 Chimeric leader peptides for the generation of non-natural hybrid RiPP products.  
771 *ACS Cent. Sci.* 3, 629–638.

772 Caetano, T., Barbosa, J., Möesker, E., Süßmuth, R.D., and Mendo, S. (2014).  
773 Bioengineering of lanthipeptides in *Escherichia coli*: assessing the specificity of  
774 lichenicidin and haloduracin biosynthetic machinery. *Res. Microbiol.* 165, 600–604.

775 Castañeda, A., Reddy, J.D., El-Yacoubi, B., and Gabriel, D.W. (2005). Mutagenesis of  
776 all eight *avr* Genes in *Xanthomonas campestris* pv. *campestris* had no detected

777 effect on pathogenicity, but one *avr* gene affected race specificity. *Mol. Plant.*  
778 *Microbe Interact.* *18*, 1306–1317.

779 Crooks, G.E., Hon, G., Chandonia, J.M., and Brenner, S.E. (2004). WebLogo: a  
780 sequence logo generator. *Genome Res* *14*, 1188–1190.

781 da Silva, F.G., Shen, Y., Dardick, C., Burdman, S., Yadav, R.C., de Leon, A.L., and  
782 Ronald, P.C. (2004). Bacterial genes involved in type I secretion and sulfation are  
783 required to elicit the rice Xa21-mediated innate immune response. *Mol. Plant.*  
784 *Microbe Interact.* *17*, 593–601.

785 Dardick, C., Schwessinger, B., and Ronald, P. (2012). Non-arginine-aspartate (non-RD)  
786 kinases are associated with innate immune receptors that recognize conserved  
787 microbial signatures. *Curr. Opin. Plant Biol.* *15*, 358–366.

788 Dirix, G., Monsieurs, P., Dombrecht, B., Daniels, R., Marchal, K., Vanderleyden, J., and  
789 Michiels, J. (2004). Peptide signal molecules and bacteriocins in Gram-negative  
790 bacteria: a genome-wide in silico screening for peptides containing a double-glycine  
791 leader sequence and their cognate transporters. *Peptides* *25*, 1425–1440.

792 Doblaz, V.G., Smakowska-Luzan, E., Fujita, S., Alassimone, J., Barberon, M.,  
793 Madalinski, M., Belkhadir, Y., and Geldner, N. (2017). Root diffusion barrier control  
794 by a vasculature-derived peptide binding to the SGN3 receptor. *Science* *355*, 280–  
795 284.

796 Farzan, M., Mirzabekov, T., Kolchinsky, P., Wyatt, R., Cayabyab, M., Gerard, N.P.,  
797 Gerard, C., Sodroski, J., and Choe, H. (1999). Tyrosine sulfation of the amino  
798 terminus of CCR5 facilitates HIV-1 entry. *Cell* *96*, 667–676.

- 799 Freeman, M. (2014). The rhomboid-like superfamily: molecular mechanisms and  
800 biological roles. *Annu. Rev. Cell Dev. Biol.* *30*, 235–254.
- 801 Furgerson Ihnken, L.A., Chatterjee, C., and van der Donk, W.A. (2008). In vitro  
802 reconstitution and substrate specificity of a lantibiotic protease. *Biochemistry* *47*,  
803 7352–7363.
- 804 Guo, M., Tian, F., Wamboldt, Y., and Alfano, J.R. (2009). The majority of the type III  
805 effector inventory of *Pseudomonas syringae* pv. tomato DC3000 can suppress plant  
806 immunity. *Mol. Plant-Microbe Interact.* *22*, 1069–1080.
- 807 Guthmiller, J.M., Kolodrubetz, D., and Kraig, E. (1995). Mutational analysis of the  
808 putative leukotoxin transport genes in *actinobacillus actinomycetemcomitans*.  
809 *Microb. Pathog.* *18*, 307–321.
- 810 Han, S.-W., Lee, S.-W., Bahar, O., Schwessinger, B., Robinson, M.R., Shaw, J.B.,  
811 Madsen, J.A., Brodbelt, J.S., and Ronald, P.C. (2012). Tyrosine sulfation in a Gram-  
812 negative bacterium. *Nat. Commun.* *3*, 1153.
- 813 Håvarstein, L.S., Holo, H., and Nes, I.F. (1994). The leader peptide of colicin V shares  
814 consensus sequences with leader peptides that are common among peptide  
815 bacteriocins produced by Gram-positive bacteria. *Microbiology* *140*, 2383–2389.
- 816 Håvarstein, L.S., Diep, D.B., and Nes, I.F. (1995). A family of bacteriocin ABC  
817 transporters carry out proteolytic processing of their substrates concomitant with  
818 export. *Mol. Microbiol.* *16*, 229–240.
- 819 Hopkins, C.M., White, F.F., Choi, S.H., Guo, A., and Leach, J.E. (1992). Identification of  
820 a family of avirulence genes from *Xanthomonas oryzae* pv. *oryzae*. *Mol. Plant*  
821 *Microbe Interact.* *5*, 451-459.

- 822 Horton, R.M., Hunt, H.D., Ho, S.N., Pullen, J.K., and Pease, L.R. (1989). Engineering  
823 hybrid genes without the use of restriction enzymes: gene splicing by overlap  
824 extension. *Gene* 77, 61–68.
- 825 Ishii, S., Yano, T., and Hayashi, H. (2006). Expression and characterization of the  
826 peptidase domain of *Streptococcus pneumoniae* ComA, a bifunctional ATP-binding  
827 cassette transporter involved in quorum sensing pathway. *J. Biol. Chem.* 281, 4726–  
828 4731.
- 829 Ishii, S., Yano, T., Ebihara, A., Okamoto, A., Manzoku, M., and Hayashi, H. (2010).  
830 Crystal structure of the peptidase domain of *Streptococcus* ComA, a bifunctional  
831 ATP-binding cassette transporter involved in the quorum-sensing pathway. *J. Biol.*  
832 *Chem.* 285, 10777–10785.
- 833 Kanonenberg, K., Schwarz, C.K.W., and Schmitt, L. (2013). Type I secretion systems -  
834 a story of appendices. *Res. Microbiol.* 164, 596–604.
- 835 Kauffman, H.E., Reddy, A.P.K., Hsieh, S.P.Y., and Merca, S.D. (1973). An improved  
836 technique for evaluating resistance of rice varieties to *Xanthomonas oryzae*. *Plant*  
837 *Dis. Repr.* 57, 537-541.
- 838 Kotake, Y., Ishii, S., Yano, T., Katsuoka, Y., and Hayashi, H. (2008). Substrate  
839 recognition mechanism of the peptidase domain of the quorum-sensing-signal-  
840 producing ABC transporter ComA from *Streptococcus*. *Biochemistry* 47, 2531–2538.
- 841 Lawton, E.M., Cotter, P.D., Hill, C., and Ross, R.P. (2007). Identification of a novel two-  
842 peptide lantibiotic, haloduracin, produced by the alkaliphile *Bacillus halodurans* C-  
843 125. *FEMS Microbiol. Lett.* 267, 64–71.

- 844 Lecher, J., Schwarz, C.K.W., Stoldt, M., Smits, S.H.J., Willbold, D., and Schmitt, L.  
845 (2012). An RTX transporter tethers its unfolded substrate during secretion via a  
846 unique N-terminal domain. *Structure* 20, 1778–1787.
- 847 Levengood, M.R., Patton, G.C., and van der Donk, W.A. (2007). The leader peptide is  
848 not required for post-translational modification by lactacin 481 synthetase. *J. Am.*  
849 *Chem. Soc.* 129, 10314–10315.
- 850 Loper, J.E., and Lindow, S.E. (1994). A biological sensor for iron available to bacteria in  
851 their habitats on plant surfaces. *Appl. Environ. Microbiol.* 60, 1934–1941.
- 852 Matsubayashi, Y., and Sakagami, Y. (1996). Phytosulfokine, sulfated peptides that  
853 induce the proliferation of single mesophyll cells of *Asparagus officinalis* L. *Proc.*  
854 *Natl. Acad. Sci.* 93, 7623–7627.
- 855 Matsuzaki, Y., Ogawa-Ohnishi, M., Mori, A., and Matsubayashi, Y. (2010). Secreted  
856 peptide signals required for maintenance of root stem cell niche in *Arabidopsis*.  
857 *Science* 329, 1065–1067.
- 858 Ménard, R., Carrière, J., Laflamme, P., Plouffe, C., Khouri, H.E., Vernet, T., Tessier,  
859 D.C., Thomas, D.Y., Storer, A.C. (1991). Contribution of the glutamine 19 side chain  
860 to transition-state stabilization in the oxyanion hole of papain. *Biochemistry* 30,  
861 8924–8928.
- 862 Morisset, D., and Frère, J. (2002). Heterologous expression of bacteriocins using the  
863 mesentericin Y105 dedicated transport system by *Leuconostoc mesenteroides*.  
864 *Biochimie* 84, 569–576.

865 Nakayama, T., Shinohara, H., Tanaka, M., Baba, K., Ogawa-Ohnishi, M., and  
866 Matsubayashi, Y. (2017). A peptide hormone required for Casparian strip diffusion  
867 barrier formation in Arabidopsis roots. *Science* 355, 284–286.

868 Nishie, M., Shioya, K., Nagao, J., Jikuya, H., and Sonomoto, K. (2009). ATP-dependent  
869 leader peptide cleavage by NukT, a bifunctional ABC transporter, during lantibiotic  
870 biosynthesis. *J. Biosci. Bioeng.* 108, 460–464.

871 Oman, T.J., and van der Donk, W.A. (2010). Follow the leader: the use of leader  
872 peptides to guide natural product biosynthesis. *Nat. Chem. Biol.* 6, 9–18.

873 Oman, T.J., Knerr, P.J., Bindman, N.A., Velásquez, J.E., and van der Donk, W.A.  
874 (2012). An engineered lantibiotic synthetase that does not require a leader peptide  
875 on its substrate. *J. Am. Chem. Soc.* 134, 6952–6955.

876 Pruitt, R.N., Schwessinger, B., Joe, A., Thomas, N., Liu, F., Albert, M., Robinson, M.R.,  
877 Chan, L.J.G., Luu, D.D., Chen, H., et al. (2015). The rice immune receptor XA21  
878 recognizes a tyrosine-sulfated protein from a Gram-negative bacterium. *Sci. Adv.* 1,  
879 e1500245.

880 Pruitt, R.N., Joe, A., Zhang, W., Feng, W., Stewart, V., Schwessinger, B., Dinneny, J.R.,  
881 and Ronald, P.C. (2017). A microbially derived tyrosine-sulfated peptide mimics a  
882 plant peptide hormone. *New Phytol.* 215, 725–736.

883 Scheuermann, T.H., Padrick, S.B., Gardner, K.H., and Brautigam, C.A. (2016). On the  
884 acquisition and analysis of microscale thermophoresis data. *Anal. Biochem.* 496,  
885 79–93.

- 886 Scholz, J., Besir, H., Strasser, C., and Suppmann, S. (2013). A new method to  
887 customize protein expression vectors for fast, efficient and background free parallel  
888 cloning. *BMC Biotechnol.* *13*, 1–11.
- 889 Schwessinger, B., Li, X., Ellinghaus, T.L., Chan, L.J.G., Wei, T., Joe, A., Thomas, N.,  
890 Pruitt, R., Adams, P.D., Chern, M.S., et al. (2016). A second-generation expression  
891 system for tyrosine-sulfated proteins and its application in crop protection. *Integr.*  
892 *Biol.* *8*, 542–545.
- 893 Sievers, F., Wilm, A., Dineen, D., Gibson, T.J., Karplus, K., Li, W., Lopez, R.,  
894 McWilliam, H., Remmert, M., Söding, J., et al. (2011). Fast, scalable generation of  
895 high-quality protein multiple sequence alignments using Clustal Omega. *Mol. Syst.*  
896 *Biol.* *7*, 539. doi:10.1038/msb.2011.75.
- 897 Song, W.Y., Wang, G.L., Chen, L.L., Kim, H.S., Pi, L.Y., Holsten, T., Gardner, J., Wang,  
898 B., Zhai, W.X., Zhu, L.H., et al. (1995). A receptor kinase-like protein encoded by the  
899 rice disease resistance gene, Xa21. *Science* *270*, 1804–1806.
- 900 Stone, M.J., Chuang, S., Hou, X., Shoham, M., and Zhu, J.Z. (2009). Tyrosine sulfation:  
901 an increasingly recognised post-translational modification of secreted proteins. *New*  
902 *Biotechnol.* *25*, 299–317.
- 903 Tsuge, S., Furutani, A., Fukunaka, R., Oku, T., Tsuno, K., Ochiai, H., Inoue, Y., Kaku,  
904 H., and Kubo, Y. (2002). Expression of *Xanthomonas oryzae* pv. *oryzae* hrp genes  
905 in XOM2, a novel synthetic medium. *J. Gen. Plant Pathol.* *68*, 363–371.
- 906 Wang, J., Li, H., Han, Z., Zhang, H., Wang, T., Lin, G., Chang, J., Yang, W., and Chai,  
907 J. (2015). Allosteric receptor activation by the plant peptide hormone phytosulfokine.  
908 *Nature* *525*, 265–268.



- 909 Wei, T., Chern, M., Liu, F., and Ronald, P.C. (2016). Suppression of bacterial infection  
910 in rice by treatment with a sulfated peptide. *Mol. Plant Pathol.* *17*, 1493–1498.
- 911 Wienken, C.J., Baaske, P., Rothbauer, U., Braun, D., and Duhr, S. (2010). Protein-  
912 binding assays in biological liquids using microscale thermophoresis. *Nat. Commun.*  
913 *1*, 1–7.
- 914 Wu, K.H., and Tai, P.C. (2004). Cys32 and His105 are the critical residues for the  
915 calcium-dependent cysteine proteolytic activity of CvaB, an ATP-binding cassette  
916 transporter. *J. Biol. Chem.* *279*, 901–909.
- 917 Wu, K.H., Hsieh, Y.H., and Tai, P.C. (2012). Mutational analysis of Cvab, an ABC  
918 transporter involved in the secretion of active colicin V. *PLoS ONE* *7*, e35382.  
919 doi:10.1371/journal.pone.0035382.
- 920 Xie, L., Miller, L.M., Chatterjee, C., Averin, O., Kelleher, N.L., van der Donk, W.A.  
921 (2004). Lacticin 481: in vitro reconstitution of lantibiotic synthetase activity. *Science*  
922 *303*, 679–682.
- 923 Zhang, L.H., Fath, M.J., Mahanty, H.K., Tai, P.C., and Kolter, R. (1995). Genetic  
924 analysis of the colicin V secretion pathway. *Genetics* *141*, 25–32.

925

## 926 **FIGURE LEGENDS**

927

### 928 **Figure 1. Biosynthetic pathways of RiPPs and RaxX.**

929 (A) General RiPP biosynthetic pathway. The RiPP precursor and biosynthetic proteins  
930 are ribosomally synthesized. The core, which becomes the final RiPP product, is post-  
931 translationally modified by enzyme(s) encoded in the same genomic region. The N-

932 terminal leader is enzymatically removed by a protease and the modified core is  
933 exported by a transporter, releasing the mature bioactive RiPP.  
934 (B) RaxX biosynthetic pathway. The RaxX precursor is ribosomally synthesized and the  
935 core is sulfated by the sulfotransferase RaxST encoded upstream. We hypothesize that  
936 the peptidase-containing ABC (ATP-binding cassette) transporter (PCAT) RaxB  
937 removes the N-terminal leader and transports the sulfated mature RaxX peptide through  
938 the type I secretion system (T1SS) composed of RaxB, the periplasmic adaptor protein  
939 RaxA, and the genetically unlinked outer membrane protein RaxC.

940

941 **Figure 2. Sulfated RaxX peptide binds XA21ECD with high affinity.**

942 Quantification of binding between sulfated (-sY, in red) and non-sulfated (-nY, in blue)  
943 RaxX21 and sulfated PSY1 (in grey) peptides with the XA21 ectodomain (XA21<sup>ECD</sup>) by  
944 microscale thermophoresis (MST). Data points indicate the fraction of fluorescently  
945 labelled XA21 bound to the peptides during the assay (Fraction Bound [-]). The  $K_D$  and  
946 confidence intervals shown in brackets are indicated in nM. SE bars are representative  
947 of at least 2 independent measurements performed with independent protein  
948 preparations.

949

950 **Figure 3. Mature RaxX is detected in Xoo supernatants.**

951 (A) RaxX precursor sequence. Numbers above refer to the residue position relative to  
952 the predicted cleavage site; numbers below relative to the precursor peptide. Cleavage  
953 of RaxX after Gly-38, Gly-39 (in orange) would result in a leader with hydrophobic  
954 residues (in yellow) at conserved locations typical of PCAT substrates and a core

955 containing Tyr-41 (in green) sulfated by RaxST. Shown below this precursor are the  
956 synthetic RaxX peptide derivatives (RaxX21, RaxX16, RaxX13, and RaxX11) and the  
957 two tryptic peptide targets detected by selected reaction monitoring-mass spectrometry  
958 (SRM-MS).

959 (B-C) SRM-MS chromatograms of the non-processed precursor (B) and predicted  
960 mature (C) RaxX tryptic peptides detected from  $\Delta raxX(praxX-His)$  cell lysates or from  
961 PXO99 or  $\Delta raxX$  supernatants. Lines correspond to individual SRM transitions  
962 monitored. Legend indicates the detected peptide y-series fragment ion.

963 (D) Quantification of the total peak area shown in C.

964 See also Figure S1.

965

966 **Figure 4. Genetic map of candidate RaxX biosynthetic proteins.**

967 (A) *raxX* is encoded upstream of the *raxSTAB* operon, containing genes for the RaxST  
968 sulfotransferase and components of a T1SS: the RaxA periplasmic adaptor protein and  
969 the RaxB PCAT.

970 (B) Genes for components of a second peptidase-containing transporter system are not  
971 genetically linked to *raxX*: *pctA* and *pctB*, encoding a periplasmic adaptor protein and  
972 PCAT, respectively.

973

974 **Figure 5. The  $\Delta raxB \Delta pctB$  double mutant does not secrete RaxX, but secretion  
975 can be restored with the *praxSTAB* plasmid.**

976 (A-C) Rice plants were inoculated by scissor clipping with PXO99-derived strains.

977 (A) Bars represent the mean + SD of lesions (cm) measured 14 days post inoculation  
978 (dpi) of TP309 (blue dots) or XA21-TP309 (red dots) plants (n = 21-28).  
979 (B) Inoculated XA21-TP309 leaves 14 dpi. Scale bar, 1 cm.  
980 (C) Bacterial densities in planta. Data points represent the mean log CFU per 10-cm  
981 leaf section  $\pm$  SE (n = 3).  
982 (D) SRM-MS was used to detect the presence of mature RaxX in *Xoo* supernatants.  
983 Bars represent the total peak area of the chromatograms shown in Figure S3C.  
984 \*\*p < 0.01; compared to PXO99 using Dunnett's test. Similar results were observed in 5  
985 (A) or 2 (C) other experiments, except  $\Delta$ *raxB* formed lesions comparable to PXO99 in  
986 roughly half.  
987 See also Figures S2 and S3.

988

989 **Figure 6. Mutation of the RaxB peptidase catalytic triad impairs RaxX maturation**  
990 **and secretion.**

991 (A) Alignment of the peptidase C- and H-motifs of RaxB and PctB to select PCATs or  
992 ABC transporters with a C39-like domain (CLD; listed in method details). Cys-His-  
993 Asp/Asn catalytic triad highlighted in yellow, oxyanion hole Gln in green, and residues  
994 common in at least 6 of the transporters in gray.  
995 (B-D) Rice plants were inoculated by scissor clipping with the indicated strains.  
996 (B) Bars represent the mean + SD of lesion measurements (cm) on TP309 (blue dots)  
997 or XA21-TP309 (red dots) plants 14 dpi (n = 10-16).  
998 (C) Inoculated XA21-TP309 leaves 14 dpi. Scale bar, 1 cm.

999 (D) Bacterial densities in planta. Data points represent the mean log CFU per 10-cm  
1000 leaf section  $\pm$  SE (n = 3). Performed at the same time as Figure 5C.

1001 (E) SRM-MS chromatograms of mature RaxX tryptic peptide detected in supernatants  
1002 from the  $\Delta raxB \Delta pctB$  double mutant-derived strains.

1003 \*\*p < 0.01; compared to PXO99 using Dunnett's test. Similar results were observed in 5  
1004 (B) or 2 (D) other independent experiments.

1005

1006 **Figure 7. Mutation of the Gly-Gly cleavage site compromises RaxX maturation**  
1007 **and secretion.**

1008 (A) Sequence logo of the leader from all *Xanthomonas* RaxX alleles. Conserved Gly-Gly  
1009 preceding the cleavage site boxed in orange; hydrophobic residues in conserved  
1010 positions typical of PCAT substrates boxed in black.

1011 (B-C) Rice plants were inoculated by scissor clipping.

1012 (B) Bars represent the mean + SD of lesion measurements (cm) on TP309 (blue dots)  
1013 or XA21-TP309 (red dots) plants 14 dpi (n = 8-13). Similar results were observed in at  
1014 least 6 independent experiments.

1015 (C) Bars represent the mean log CFU/leaf section  $\pm$  SE measured 14 dpi (n = 4).

1016 (D) SRM-MS chromatograms of mature RaxX tryptic peptide detected in Xoo  
1017 supernatants.

1018 (E) Quantification of the total peak area shown in D.

1019 \*p < 0.05; \*\*p < 0.01; compared to PXO99 using Dunnett's test.

1020 See also Figure S4.

# FIGURES

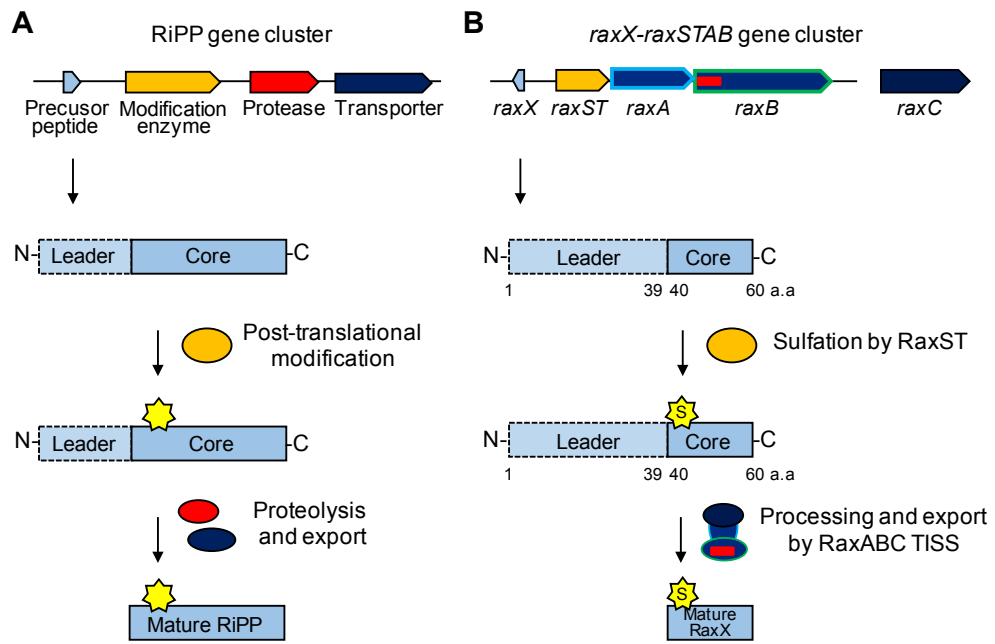

Figure 1

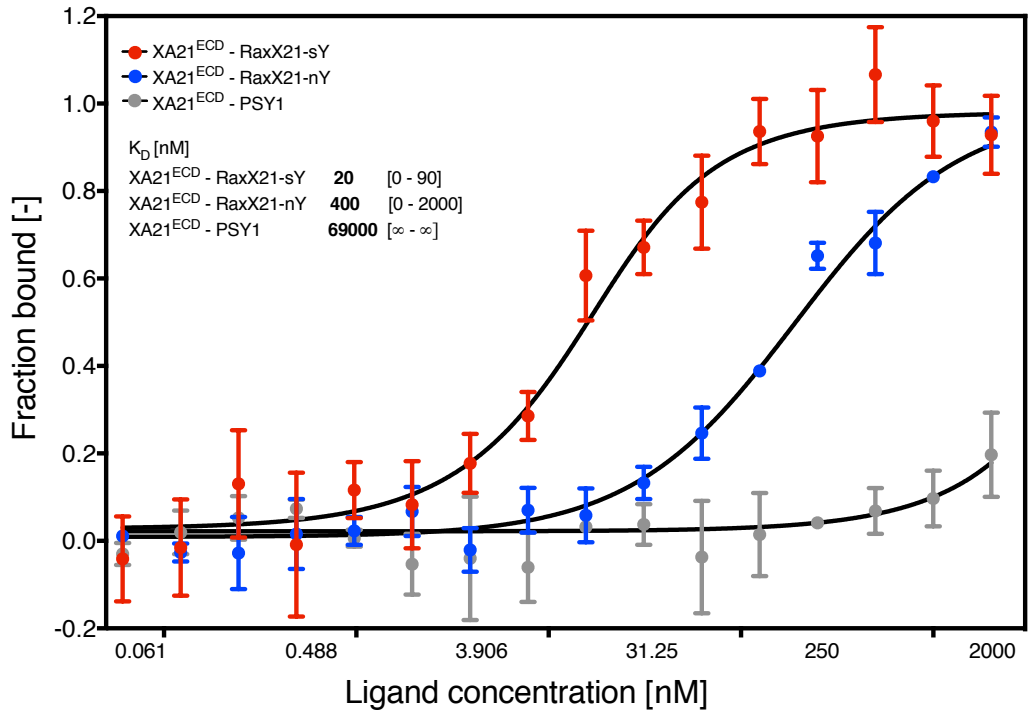

Figure 2

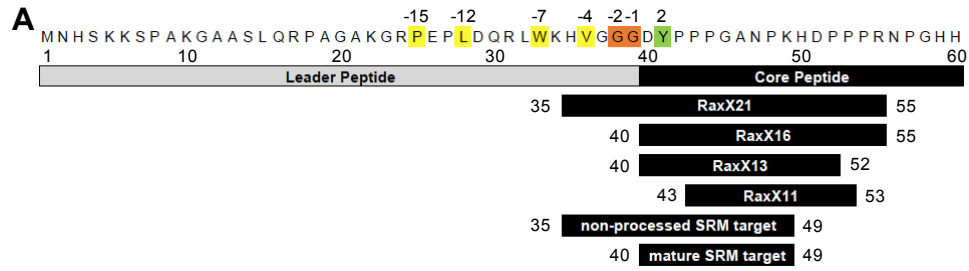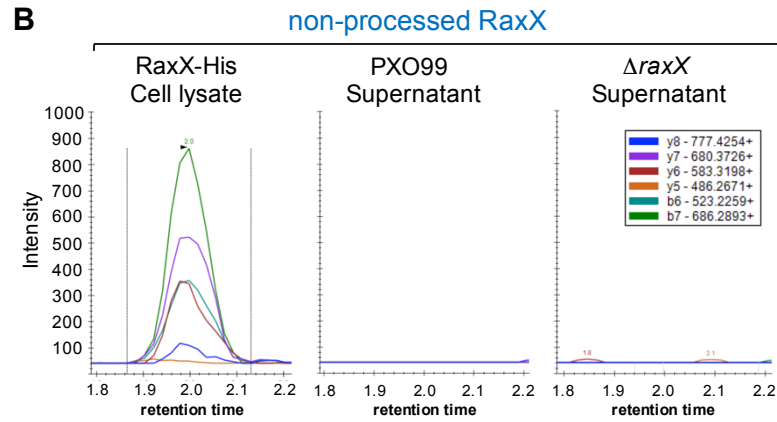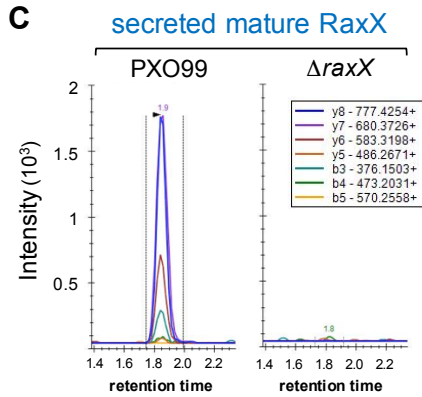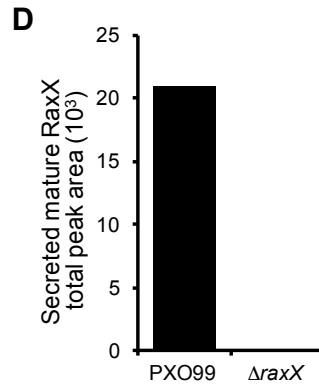

Figure 3



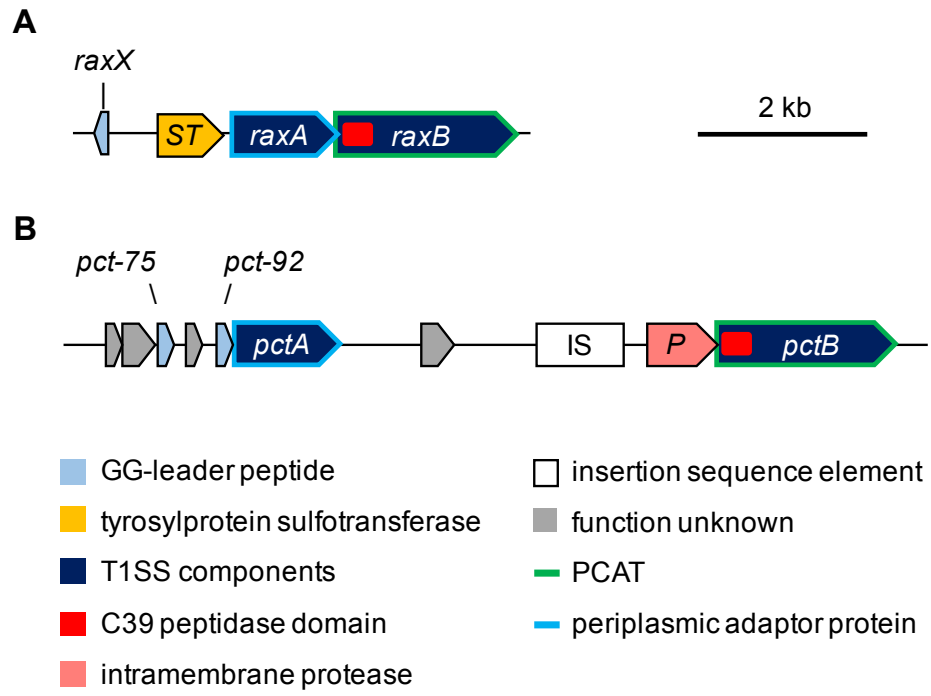

**Figure 4**

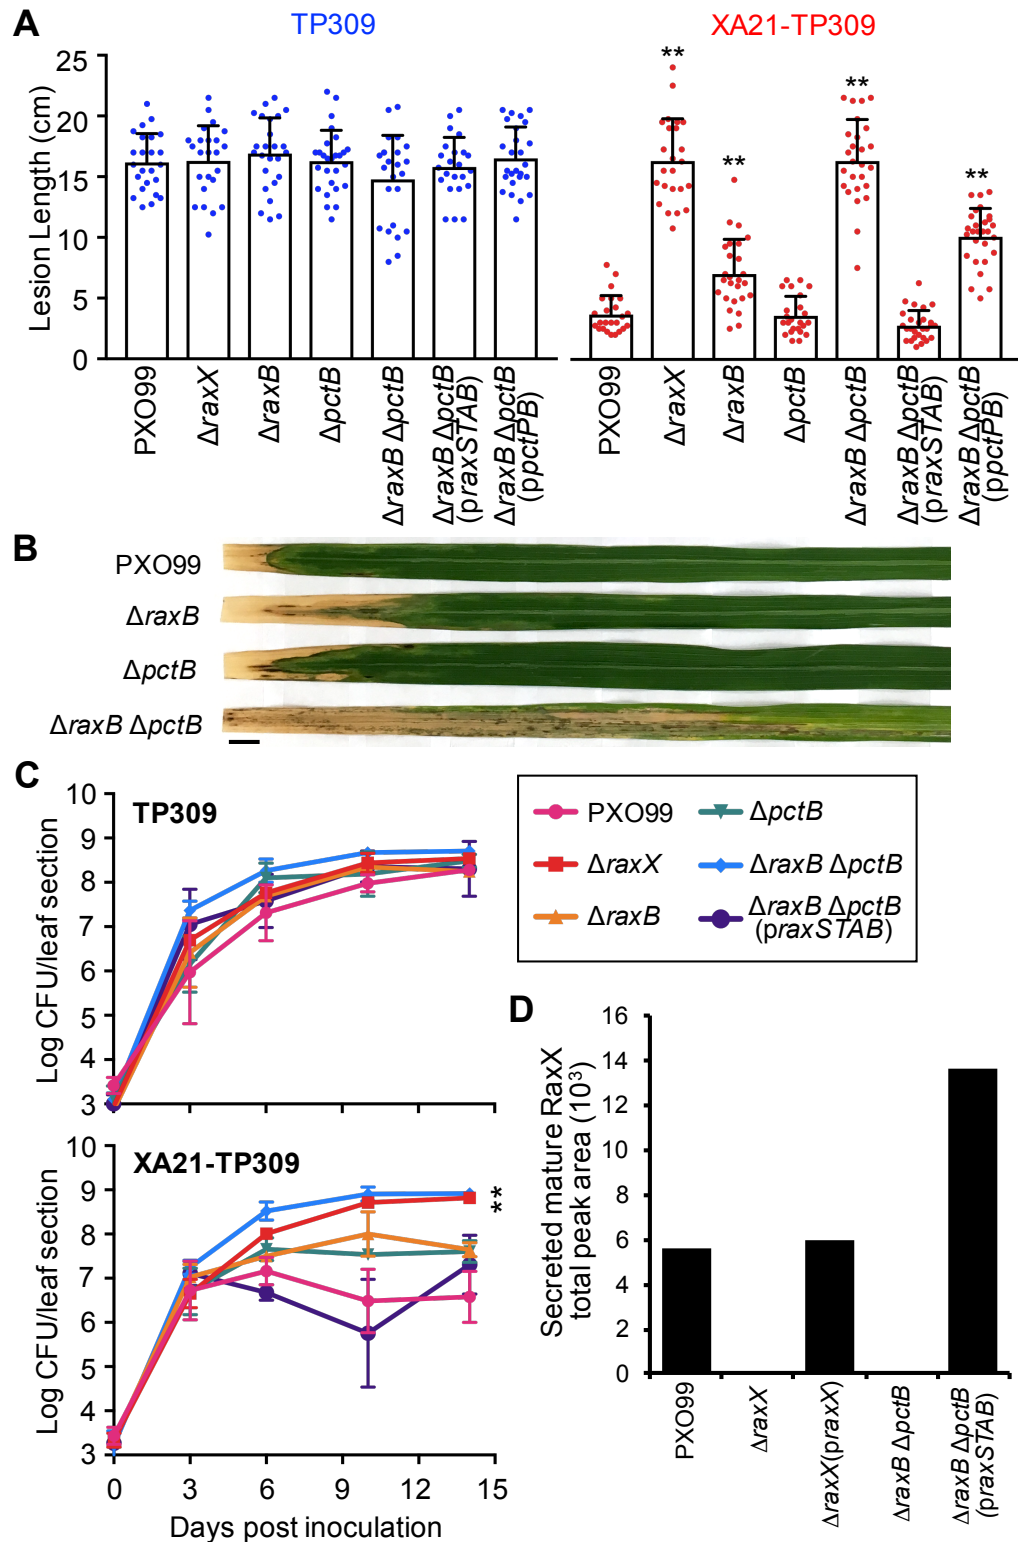

Figure 5

|      | C-motif |                               | H-motif |     |
|------|---------|-------------------------------|---------|-----|
| RaxB | 22      | QGVGECGLAAMAMIAHYHGCGIQLAELR  | 50      | 101 |
| PctB | 6       | QAEASECGLASLAMVASAHGMQLDLPELR | 34      | 85  |
| CvaB | 26      | QTETAECGLACLAMICGHFGKNIDLIYLR | 54      | 105 |
| MesD | 16      | QVDERDCGVAALAMILAHYKTRLSLAKLR | 44      | 101 |
| ComA | 11      | QVDQDCGVASLAMVFGYGSYYFLAHLR   | 39      | 96  |
| LagD | 7       | QDEKDCGVACIAMILKHYGTEITIQLRLR | 35      | 92  |
| LctT | 6       | QNEQDCLLACYSMILGYFGRDVAIHELY  | 34      | 90  |
| NukT | 6       | QNSDQDCLLACYSMILSYFGKNVSINSLY | 34      | 90  |
| LktB | 3       | SQKNTNLALQALEVLAQYHNISINPEEIK | 31      | 83  |
| HlyB | 3       | SCHKIDYGLYALEILAQYHNVSVPPEIK  | 31      | 83  |

CLD

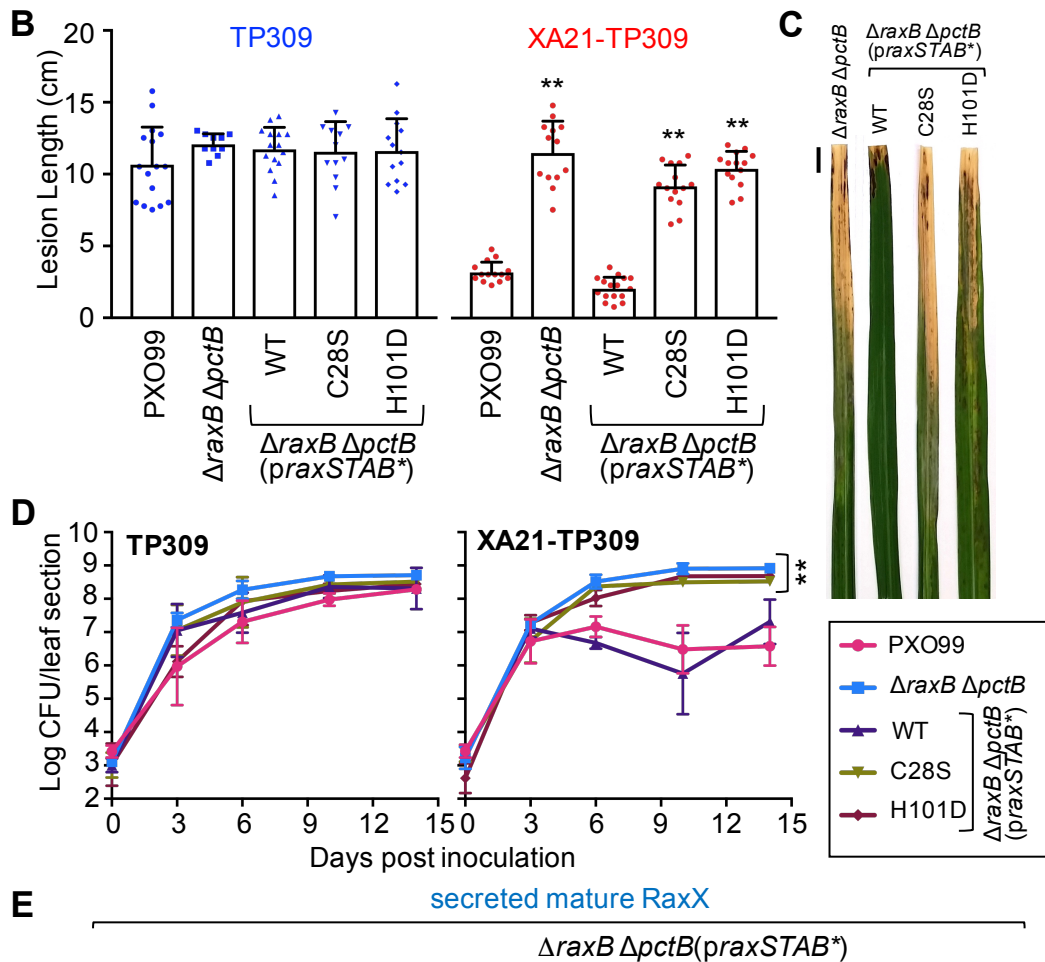

Figure 6

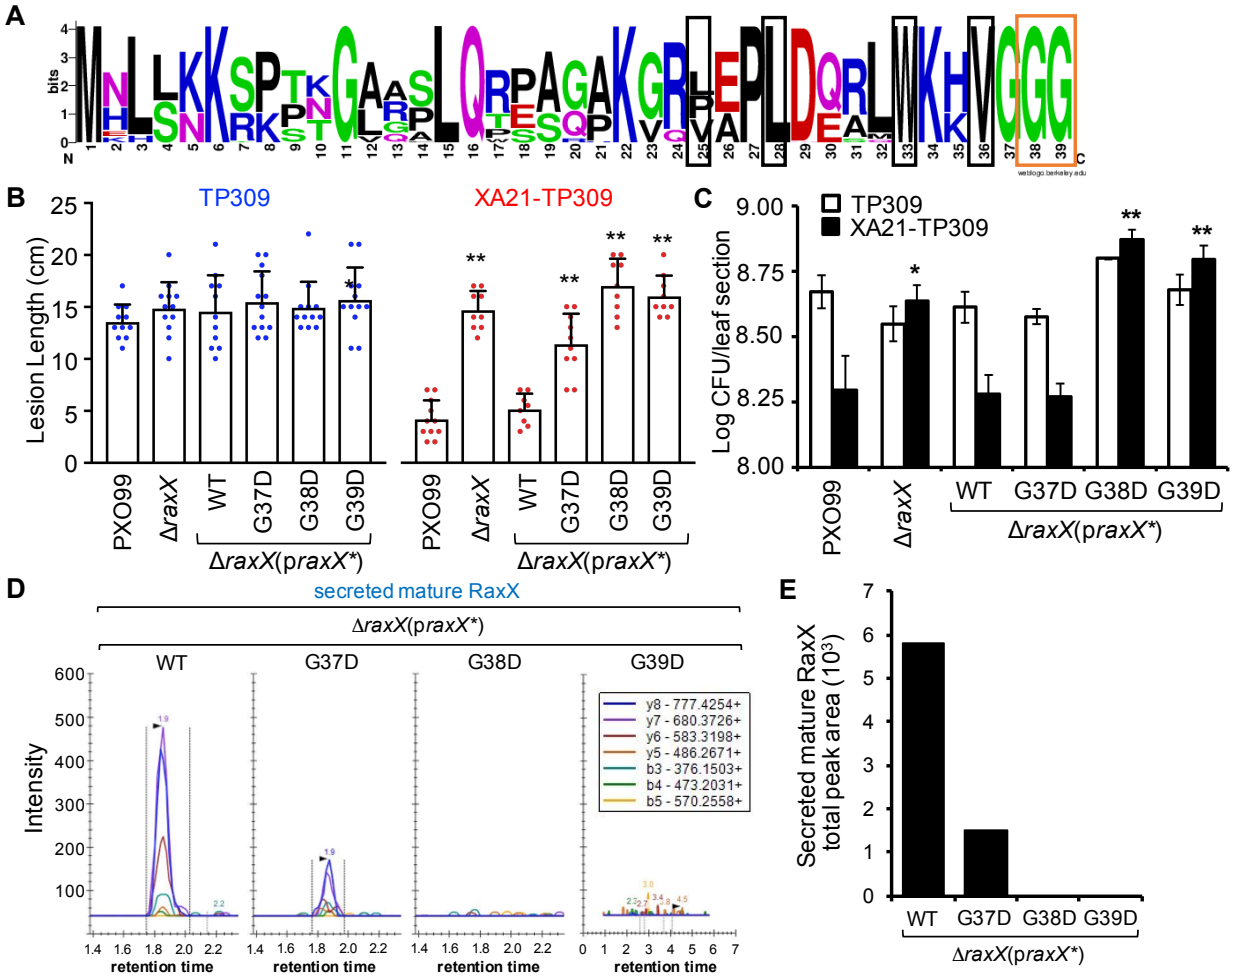

Figure 7
